# Supplementary material for: Systematic Review and Network Meta‐analysis of Acupuncture Combined with Massage in Treating Knee Osteoarthritis
Source: Hindawi journal article supplement (doi:10.1155/2022/4048550), 2022-01-01
Supplement: f1 [file 4048550.f1.pdf]

**Systematic Review and Network Meta-analysis of Acupuncture Combined with Massage in Treating Knee Osteoarthritis**

Zhen Wang, Congan Wang, Yongquan Wang, Xujie Li, Ziyang Zhou, Lijuan Zhang, Miaoxiu Li, Yankun Pan, Ti Yong Jiao, Xiaoyun Shi, Qing Liu.

**Supplementary materials**

|                                          |                                                                                  |                  |
|------------------------------------------|----------------------------------------------------------------------------------|------------------|
|                                          |                                                                                  |                  |
| <b>Table S1</b>                          | <b>Search Strategies of Network Meta-analysis</b>                                | <b>Page2-3</b>   |
| <b>Figure S1</b>                         | <b>Risk of bias summary</b>                                                      | <b>page4</b>     |
| <b>Figure S2-S9;<br/>Table S2-S4</b>     | <b>The results of total WOMAC,<br/>WOMAC stiffness and joint function scores</b> | <b>Page5-11</b>  |
| <b>Figure S10-S21;<br/>Table S3-S10</b>  | <b>The results of sensitivity analyses</b>                                       | <b>Page12-28</b> |
| <b>Figure S22-S27;<br/>Table S11-S16</b> | <b>The results of subgroup analysis</b>                                          | <b>Page29-37</b> |
| <b>Table S17</b>                         | <b>Introduction to different acupuncture and massage therapies</b>               | <b>Page38-39</b> |
| <b>Table S18</b>                         | <b>The checklist of the PRISMA for network meta-analysis</b>                     | <b>Page40-44</b> |

**Table S1 Search Strategies of Network Meta-analysis**

|                                                                                                                                                                                                                                                                                                                                                                                                                                                                                                                                                                                                                                                                                                                                                                                                                                                                                                                                                                                                                                                                                                                                                                                                                                                                                                                                                                                                                                                                                                                                                                                                                                                                                                                                                                                                                                                                                                                                                                                                                                                                                                                                                                                                                                                                                                                                                                                                                                                                                                                                                                                                                                                                                                                                                                                                                                                                                                                                                                                                                                                                                                                                                                                               |
|-----------------------------------------------------------------------------------------------------------------------------------------------------------------------------------------------------------------------------------------------------------------------------------------------------------------------------------------------------------------------------------------------------------------------------------------------------------------------------------------------------------------------------------------------------------------------------------------------------------------------------------------------------------------------------------------------------------------------------------------------------------------------------------------------------------------------------------------------------------------------------------------------------------------------------------------------------------------------------------------------------------------------------------------------------------------------------------------------------------------------------------------------------------------------------------------------------------------------------------------------------------------------------------------------------------------------------------------------------------------------------------------------------------------------------------------------------------------------------------------------------------------------------------------------------------------------------------------------------------------------------------------------------------------------------------------------------------------------------------------------------------------------------------------------------------------------------------------------------------------------------------------------------------------------------------------------------------------------------------------------------------------------------------------------------------------------------------------------------------------------------------------------------------------------------------------------------------------------------------------------------------------------------------------------------------------------------------------------------------------------------------------------------------------------------------------------------------------------------------------------------------------------------------------------------------------------------------------------------------------------------------------------------------------------------------------------------------------------------------------------------------------------------------------------------------------------------------------------------------------------------------------------------------------------------------------------------------------------------------------------------------------------------------------------------------------------------------------------------------------------------------------------------------------------------------------------|
| <p style="text-align: center;"><b>Pubmed(Search date: July 15, 2021)</b></p> <p>((((Osteoarthritis, Knee[MeSH Terms]) OR (Knee Osteoarthritis[Title/Abstract])) OR (Knee Osteoarthritis[Title/Abstract])) OR (Osteoarthritis of Knee[Title/Abstract])) OR (Osteoarthritis of the Knee[Title/Abstract])) AND (((((((((((((((((((Acupuncture[MeSH Terms]) OR (Acupuncture[Title/Abstract])) OR (Pharmacopuncture[Title/Abstract])) OR (the warming acupuncture[Title/Abstract])) OR (warm acupuncture[Title/Abstract])) OR (warm needling acupuncture[Title/Abstract])) OR (Electroacupuncture[MeSH Terms])) OR (Electroacupuncture[Title/Abstract])) OR (fire needle[Title/Abstract])) OR (Acupuncture Therapy[MeSH Terms])) OR (Acupuncture Therapy[Title/Abstract])) OR (Acupuncture Treatment[Title/Abstract])) OR (Acupuncture Treatments[Title/Abstract])) OR (Pharmacopuncture Treatment[Title/Abstract])) OR (Pharmacopuncture Therapy[Title/Abstract])) OR (Acupotomy[Title/Abstract])) OR (Acupotomies[Title/Abstract])) OR (Water acupotomy therapy[Title/Abstract])) OR (Silver needle[Title/Abstract])) OR (Bloodletting acupuncture[Title/Abstract])) OR (Puncture cupping[Title/Abstract])) OR (Floating needle[Title/Abstract])) OR (Needles[MeSH Terms])) OR (Needles[Title/Abstract])) OR (Hypodermic Needles[Title/Abstract])) OR (Hypodermic Needle[Title/Abstract])) AND (((((((Tuina[Title/Abstract]) OR (Osteopathy[MeSH Terms])) OR (Osteopathy[Title/Abstract])) OR (Zone Therapy[Title/Abstract])) OR (Zone Therapies[Title/Abstract])) OR (Massage Therapy[Title/Abstract])) OR (Massage Therapies[Title/Abstract])) OR (massotherapy[Title/Abstract])) OR (Joint mobilization[Title/Abstract]))</p> <p style="text-align: center;"><b>Cochrane library(Search date: July 15, 2021)</b></p> <p>#1 'Knee Osteoarthritis':ti,ab,kw OR 'Osteoarthritis of Knee':ti,ab,kw OR 'Osteoarthritis of the Knee':ti,ab,kw</p> <p>#2 Acupuncture:ti,ab,kw OR Pharmacopuncture:ti,ab,kw OR the warming acupuncture:ti,ab,kw OR warm acupuncture:ti,ab,kw OR warm needling acupuncture:ti,ab,kw OR Electroacupuncture:ti,ab,kw OR fire needle:ti,ab,kw OR Acupotomy:ti,ab,kw OR Water acupotomy therapy:ti,ab,kw OR Silver needle:ti,ab,kw OR Bloodletting acupuncture:ti,ab,kw OR Puncture cupping:ti,ab,kw OR Floating needle:ti,ab,kw OR Needles:ti,ab,kw</p> <p>#3 Tuina:ti,ab,kw OR Massage:ti,ab,kw OR Zone Therapy:ti,ab,kw OR massotherapy:ti,ab,kw OR Joint mobilization:ti,ab,kw</p> <p>#1 AND #2 AND #3</p> <p style="text-align: center;"><b>Web of science(Search date: July 15, 2021)</b></p> <p>#3 AND #2 AND #1</p> <p>#3 TS=(Tuina OR Massage OR Zone Therapy OR massotherapy OR Joint mobilization)</p> <p>#2 TS=(Acupuncture OR Pharmacopuncture OR the warming acupuncture OR warm acupuncture OR warm needling OR Electroacupuncture OR fire needle OR Acupotomy OR Water acupotomy therapy OR Silver needle OR Bloodletting acupuncture OR Floating needle OR Needle OR Needles)</p> <p>#1 TS=(Knee Osteoarthritis OR Osteoarthritis of Knee OR Osteoarthritis of the Knee)</p> <p style="text-align: center;"><b>EMbase(Search date: July 15, 2021)</b></p> |
|-----------------------------------------------------------------------------------------------------------------------------------------------------------------------------------------------------------------------------------------------------------------------------------------------------------------------------------------------------------------------------------------------------------------------------------------------------------------------------------------------------------------------------------------------------------------------------------------------------------------------------------------------------------------------------------------------------------------------------------------------------------------------------------------------------------------------------------------------------------------------------------------------------------------------------------------------------------------------------------------------------------------------------------------------------------------------------------------------------------------------------------------------------------------------------------------------------------------------------------------------------------------------------------------------------------------------------------------------------------------------------------------------------------------------------------------------------------------------------------------------------------------------------------------------------------------------------------------------------------------------------------------------------------------------------------------------------------------------------------------------------------------------------------------------------------------------------------------------------------------------------------------------------------------------------------------------------------------------------------------------------------------------------------------------------------------------------------------------------------------------------------------------------------------------------------------------------------------------------------------------------------------------------------------------------------------------------------------------------------------------------------------------------------------------------------------------------------------------------------------------------------------------------------------------------------------------------------------------------------------------------------------------------------------------------------------------------------------------------------------------------------------------------------------------------------------------------------------------------------------------------------------------------------------------------------------------------------------------------------------------------------------------------------------------------------------------------------------------------------------------------------------------------------------------------------------------|

#3 AND #2 AND #1

#3 Tuina:ab,ti OR Massage:ab,ti OR Zone Therapy:ab,ti OR massotherapy:ab,ti OR Joint mobilization:ab,ti OR

#2 Acupuncture:ab,ti OR Pharmacopuncture:ab,ti OR the warming acupuncture:ab,ti OR warm acupuncture:ab,ti OR warm needling:ab,ti OR Electroacupuncture:ab,ti OR fire needle:ab,ti OR Acupotomy:ab,ti OR Water acupotomy therapy:ab,ti OR Silver needle:ab,ti OR Bloodletting acupuncture:ab,ti OR Floating needle:ab,ti OR Needle:ab,ti OR Needles:ab,ti

#1 'Knee Osteoarthritis':ab,ti OR 'Osteoarthritis of Knee':ab,ti OR 'Osteoarthritis of the Knee':ab,ti

**China National Knowledge Infrastructure (CNKI) (Search date: July 15, 2021)**

(SU=膝骨关节炎 OR SU=膝关节骨性关节炎 OR SU=膝关节骨关节病 OR SU=膝关节退行性关节炎 OR SU=膝痹 OR SU=膝痛症) AND (SU=针灸 OR SU=电针 OR SU=温针 OR SU=针刺 OR SU=动筋针 OR SU=火针 OR SU=针刀 OR SU=刃针 OR SU=刺络放血 OR SU=浮针 OR SU=针) AND (SU=推拿 OR SU=按摩 OR SU=整脊 OR SU=手法 OR SU=理筋)

**VIP Database(Search date: July 15, 2021)**

M=(膝骨关节炎 OR 膝关节骨性关节炎 OR 膝关节骨关节病 OR 膝关节退行性关节炎 OR 膝痹 OR 膝痛症) AND M=(针灸 OR 电针 OR 温针 OR 针刺 OR 动筋针 OR 火针 OR 针刀 OR 刃针 OR 刺络放血 OR 浮针 OR 针) AND M=(推拿 OR 按摩 OR 整脊 OR 手法 OR 理筋)

**Chinese Biomedical Literature Database (CBM)(Search date: July 15, 2021)**

(膝骨关节炎[标题] OR 膝关节骨性关节炎[标题] OR 膝关节骨关节病[标题] OR 膝关节退行性关节炎[标题] OR 膝痹[标题] OR 膝痛症[标题]) AND (针灸[摘要] OR 电针[摘要] OR 温针[摘要] OR 针刺[摘要] OR 动筋针[摘要] OR 火针[标题] OR 针刀[摘要] OR 刃针[摘要] OR 刺络放血[摘要] OR 浮针[摘要] OR 针[摘要]) AND (推拿[摘要] OR 按摩[摘要] OR 整脊[摘要] OR 手法[摘要] OR 理筋[摘要])

**Wanfang databases(Search date: July 15, 2021)**

主题:(膝骨关节炎 or 膝关节骨性关节炎 or 膝关节骨关节病 or 膝关节退行性关节炎 or 膝痹 or 膝痛症) and 主题:(针灸 or 电针 or 温针 or 针刺 or 动筋针 or 火针 or 针刀 or 刃针 or 刺络放血 or 浮针 or 针) and 主题:(推拿 or 按摩 or 整脊 or 手法 or 理筋)

**Figure S1 Risk of bias summary**

|                      | Random sequence generation (selection bias) | Allocation concealment (selection bias) | Blinding of participants and personnel (performance bias) | Blinding of outcome assessment (detection bias) | Incomplete outcome data (attrition bias) | Selective reporting (reporting bias) | Other bias |
|----------------------|---------------------------------------------|-----------------------------------------|-----------------------------------------------------------|-------------------------------------------------|------------------------------------------|--------------------------------------|------------|
| Chen Chaowei 2018    | ●                                           | ?                                       | ?                                                         | ?                                               | ●                                        | ●                                    | ?          |
| Chen Haitao 2019     | ?                                           | ?                                       | ?                                                         | ?                                               | ●                                        | ●                                    | ?          |
| Chen Lanjun 2020     | ●                                           | ?                                       | ?                                                         | ?                                               | ●                                        | ●                                    | ?          |
| Chen Yanping 2019    | ●                                           | ?                                       | ?                                                         | ?                                               | ●                                        | ●                                    | ?          |
| Deng Ning 2012       | ●                                           | ?                                       | ?                                                         | ?                                               | ●                                        | ●                                    | ?          |
| Ding Yiqun 2010      | ?                                           | ?                                       | ?                                                         | ?                                               | ●                                        | ●                                    | ?          |
| Dong Linlin 2020     | ●                                           | ?                                       | ?                                                         | ?                                               | ●                                        | ●                                    | ?          |
| Gao bo 2018          | ?                                           | ?                                       | ?                                                         | ?                                               | ●                                        | ●                                    | ?          |
| Guan Xiangxin 2019   | ?                                           | ?                                       | ?                                                         | ?                                               | ●                                        | ●                                    | ?          |
| Huang Dongliang 2020 | ●                                           | ?                                       | ?                                                         | ?                                               | ●                                        | ●                                    | ?          |
| Huang Ke 2013        | ●                                           | ?                                       | ?                                                         | ?                                               | ●                                        | ●                                    | ?          |
| Huang Panyin 2007    | ?                                           | ?                                       | ?                                                         | ?                                               | ●                                        | ●                                    | ?          |
| Jiang Shengyun 2014  | ●                                           | ?                                       | ?                                                         | ?                                               | ●                                        | ●                                    | ?          |
| Liang Wei 2012       | ●                                           | ?                                       | ?                                                         | ?                                               | ●                                        | ●                                    | ?          |
| Liao Chunhong 2015   | ?                                           | ?                                       | ?                                                         | ?                                               | ●                                        | ●                                    | ?          |
| Li Chao 2015         | ●                                           | ?                                       | ?                                                         | ?                                               | ●                                        | ●                                    | ?          |
| Li Chao 2020         | ●                                           | ?                                       | ?                                                         | ?                                               | ●                                        | ●                                    | ?          |
| Li Jjie 2019         | ●                                           | ?                                       | ?                                                         | ?                                               | ●                                        | ●                                    | ?          |
| Lin Yuanfang 2012    | ●                                           | ?                                       | ●                                                         | ?                                               | ●                                        | ●                                    | ?          |
| Li Shuqiang 2017     | ?                                           | ?                                       | ?                                                         | ?                                               | ●                                        | ●                                    | ?          |
| Li Xia 2017          | ?                                           | ?                                       | ?                                                         | ?                                               | ●                                        | ●                                    | ?          |
| Lu Kaixu 2014        | ●                                           | ?                                       | ?                                                         | ?                                               | ●                                        | ●                                    | ?          |
| Ma Minghua 2020      | ●                                           | ?                                       | ?                                                         | ?                                               | ●                                        | ●                                    | ?          |
| Ma Youmeng 2016      | ?                                           | ?                                       | ?                                                         | ?                                               | ●                                        | ●                                    | ?          |
| Ning Yu 2013         | ●                                           | ?                                       | ?                                                         | ?                                               | ●                                        | ●                                    | ?          |
| Qiao Lei 2017        | ●                                           | ?                                       | ?                                                         | ?                                               | ●                                        | ●                                    | ?          |
| Qiu Xiuyu 2020       | ●                                           | ?                                       | ?                                                         | ?                                               | ●                                        | ●                                    | ?          |
| Shen Linxing 2020    | ●                                           | ?                                       | ?                                                         | ?                                               | ●                                        | ●                                    | ?          |
| Wang Feng 2017       | ●                                           | ?                                       | ?                                                         | ?                                               | ●                                        | ●                                    | ?          |
| Wang Haoran 2019     | ?                                           | ?                                       | ?                                                         | ?                                               | ●                                        | ●                                    | ?          |
| Wang Lijun 2021      | ?                                           | ?                                       | ?                                                         | ?                                               | ●                                        | ●                                    | ?          |
| Wang Luodan 2015     | ●                                           | ?                                       | ?                                                         | ?                                               | ●                                        | ●                                    | ?          |
| Wang Nan 2020        | ●                                           | ?                                       | ?                                                         | ?                                               | ●                                        | ●                                    | ?          |
| Xiong Peifang 2018   | ?                                           | ?                                       | ?                                                         | ?                                               | ●                                        | ●                                    | ?          |
| Xiong Xueqiong 2014  | ●                                           | ?                                       | ●                                                         | ?                                               | ●                                        | ●                                    | ?          |
| Xu Hongyan 2018      | ●                                           | ?                                       | ?                                                         | ?                                               | ●                                        | ●                                    | ?          |
| Xu Yuanhong 2016     | ?                                           | ?                                       | ?                                                         | ?                                               | ●                                        | ●                                    | ?          |
| Ye Bihong 2018       | ●                                           | ?                                       | ?                                                         | ?                                               | ●                                        | ●                                    | ?          |
| Ye Bihong 2019       | ●                                           | ?                                       | ?                                                         | ?                                               | ●                                        | ●                                    | ?          |
| Yu Guibo 2020        | ?                                           | ?                                       | ?                                                         | ?                                               | ●                                        | ●                                    | ?          |
| Zeng Yunyan 2018     | ●                                           | ?                                       | ?                                                         | ?                                               | ●                                        | ●                                    | ?          |
| Zhang Heng 2018      | ●                                           | ?                                       | ?                                                         | ?                                               | ●                                        | ●                                    | ?          |
| Zhang Lei 2019       | ●                                           | ?                                       | ?                                                         | ?                                               | ●                                        | ●                                    | ?          |
| Zhang Yongquan 2021  | ●                                           | ?                                       | ?                                                         | ?                                               | ●                                        | ●                                    | ?          |
| Zheng Desong 2017    | ●                                           | ?                                       | ?                                                         | ?                                               | ●                                        | ●                                    | ?          |
| Zhou Haitao 2011     | ?                                           | ?                                       | ?                                                         | ?                                               | ●                                        | ●                                    | ?          |
| Zhou Hao 2021        | ●                                           | ?                                       | ?                                                         | ?                                               | ●                                        | ●                                    | ?          |
| Zhou Ling 2017       | ●                                           | ?                                       | ?                                                         | ?                                               | ●                                        | ●                                    | ?          |
| Zhu Qinghui 2020     | ●                                           | ?                                       | ?                                                         | ?                                               | ●                                        | ●                                    | ?          |

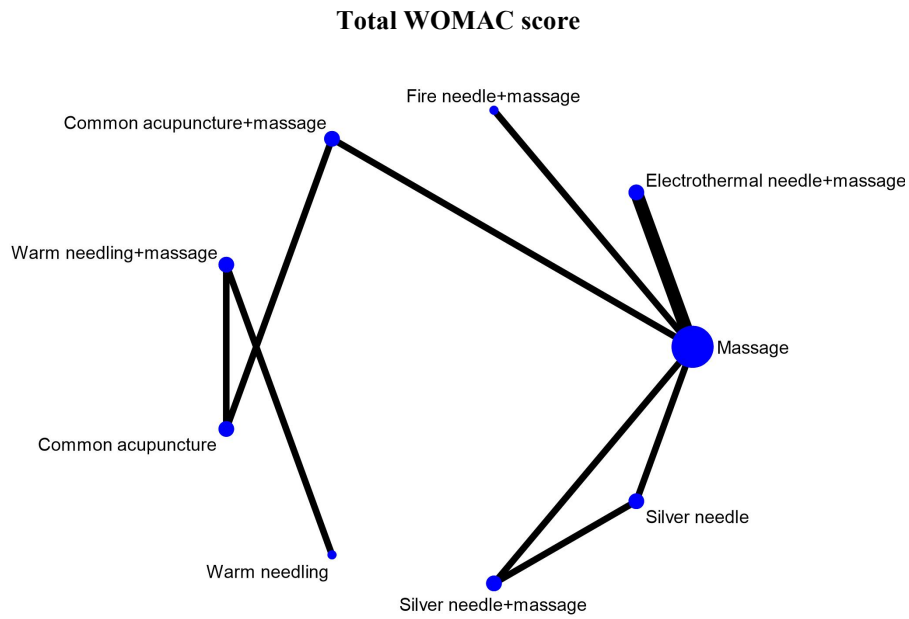

**Figure S2 Network relationship diagram of total WOMAC score**

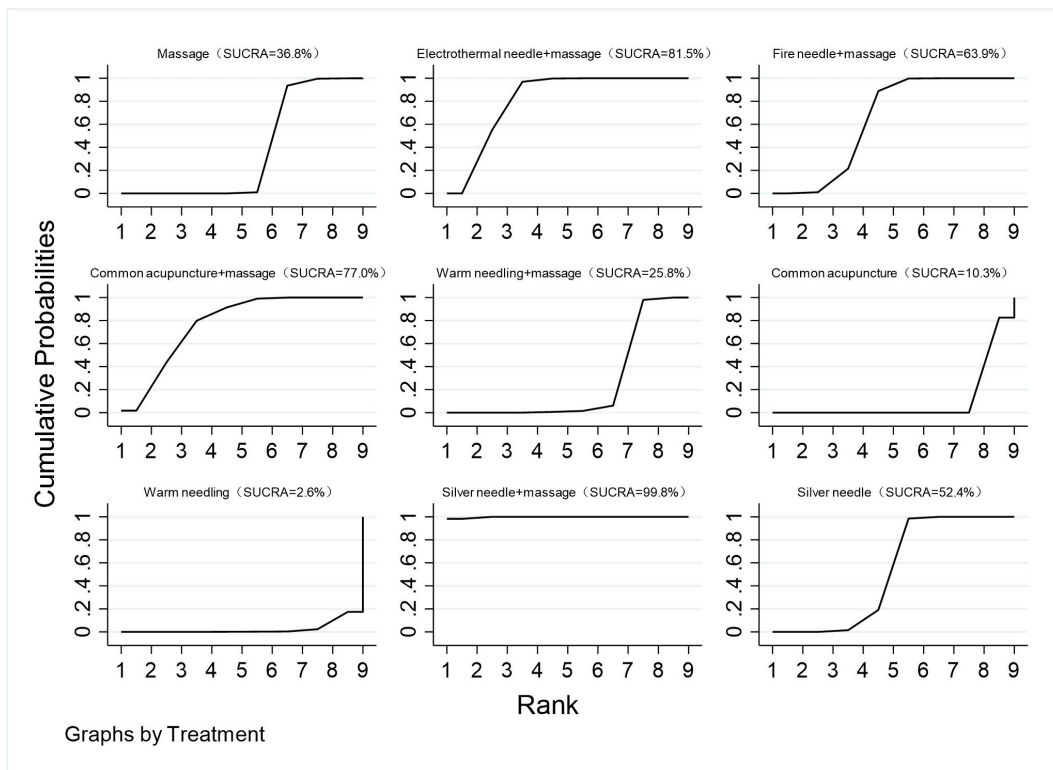

**Figure S3 Sucra of total WOMAC score**

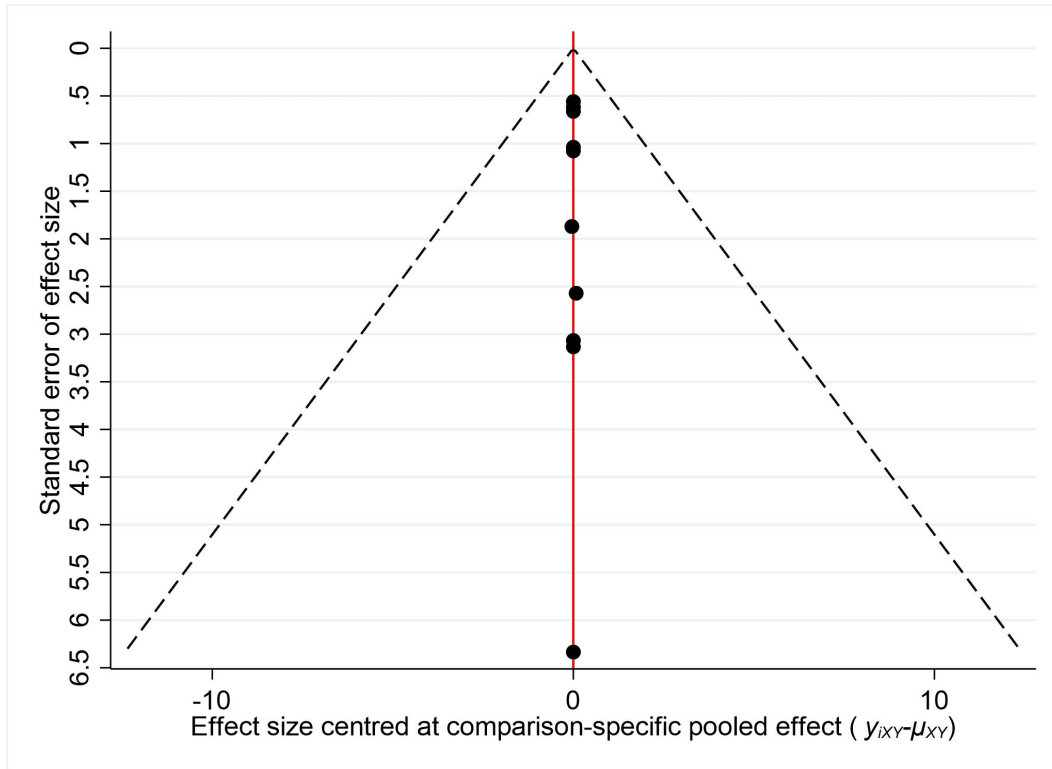

**Figure S4 The funnel plot of total WOMAC score**

**Table S2 Network Meta-analysis of Total WOMAC Score**

| Interventions                       | Silver needle + Electrothermal<br>message | Common<br>needle + message | Fire needle + Silver needle<br>acupuncture + message |
|-------------------------------------|-------------------------------------------|----------------------------|------------------------------------------------------|
| Silver<br>message                   | + 0                                       |                            |                                                      |
| Electrothermal<br>needle<br>message | -6.21 (-9.37,-3.05) <sup>1)</sup>         | 0                          |                                                      |
| Common<br>acupuncture<br>message    | -6.83 (-12.94,-0.73) <sup>1)</sup>        | -0.62 (-7.32,6.08)         | 0                                                    |

|                            |                                      |                                      |                                      |                                     |                                     |
|----------------------------|--------------------------------------|--------------------------------------|--------------------------------------|-------------------------------------|-------------------------------------|
| Fire needle +<br>massage   | -9.58 (-11.89,-7.27) <sup>1)</sup>   | -3.37 (-6.96,0.23)                   | -2.75 (-9.09,3.60)                   | 0                                   |                                     |
| Silver needle              | -11.00 (-12.21,-9.79) <sup>1)</sup>  | -4.79 (-8.02,-1.55) <sup>1)</sup>    | -4.17 (-10.31,1.98)                  | -1.42 (-3.83,0.99)                  | 0                                   |
| Massage                    | -14.10 (-15.20,-13.00) <sup>1)</sup> | -7.89 (-10.85,-4.92) <sup>1)</sup>   | -7.27 (-13.27,-1.26) <sup>1)</sup>   | -4.52 (-6.56,-2.48) <sup>1)</sup>   | -3.10 (-4.40,-1.80) <sup>1)</sup>   |
| Warm needling<br>+ massage | -20.94 (-29.85,-12.03) <sup>1)</sup> | -14.73 (-24.05,-5.40) <sup>1)</sup>  | -14.10 (-20.59,-7.61) <sup>1)</sup>  | -11.36 (-20.43,-2.28) <sup>1)</sup> | -9.94 (-18.88,-1.00) <sup>1)</sup>  |
| Common<br>acupuncture      | -27.63 (-36.29,-18.97) <sup>1)</sup> | -21.42 (-30.50,-12.33) <sup>1)</sup> | -20.79 (-26.93,-14.66) <sup>1)</sup> | -18.05 (-26.87,-9.22) <sup>1)</sup> | -16.63 (-25.31,-7.94) <sup>1)</sup> |
| Warm needle                | -33.79 (-49.07,-18.51) <sup>1)</sup> | -27.58 (-43.11,-12.05) <sup>1)</sup> | -26.95 (-40.96,-12.94) <sup>1)</sup> | -24.21 (-39.59,-8.83) <sup>1)</sup> | -22.79 (-38.09,-7.49) <sup>1)</sup> |

Table 6 continued

| Interventions                      | Massage                             | Warm needling +<br>massage          | Common<br>acupuncture | Warm needle |
|------------------------------------|-------------------------------------|-------------------------------------|-----------------------|-------------|
| Silver + massage                   |                                     |                                     |                       |             |
| Electrothermal<br>needle + massage |                                     |                                     |                       |             |
| Common<br>acupuncture +<br>massage |                                     |                                     |                       |             |
| Fire needle +<br>massage           |                                     |                                     |                       |             |
| Silver needle                      |                                     |                                     |                       |             |
| Massage                            | 0                                   |                                     |                       |             |
| Warm needling +<br>massage         | -6.84 (-15.68,2.00)                 | 0                                   |                       |             |
| Common<br>acupuncture              | -13.53 (-22.12,-4.94) <sup>1)</sup> | -6.69 (-8.80,-4.58) <sup>1)</sup>   | 0                     |             |
| Warm needle                        | -19.69 (-34.93,-4.44) <sup>1)</sup> | -12.85 (-25.27,-0.43) <sup>1)</sup> | -6.16 (-18.75,6.44)   | 0           |

Note: The difference between the two groups had statistical significance <sup>1)</sup> P < 0.05.

### WOMAC stiffness and joint function scores

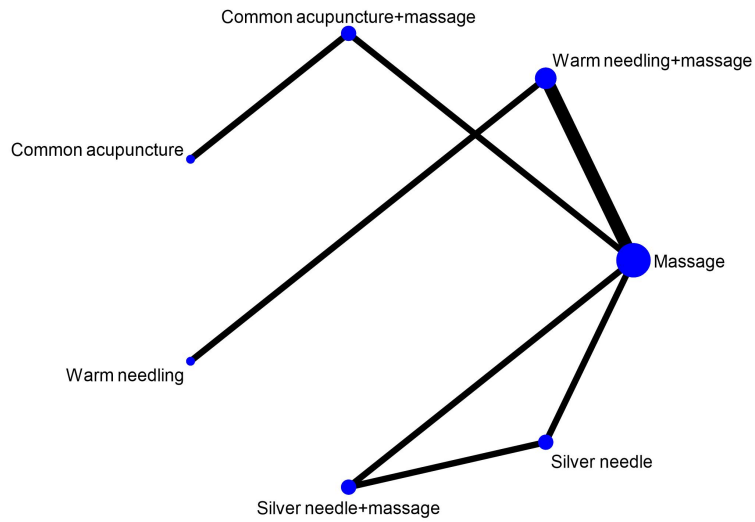

Figure S5 Network relationship diagram of WOMAC stiffness and joint function scores

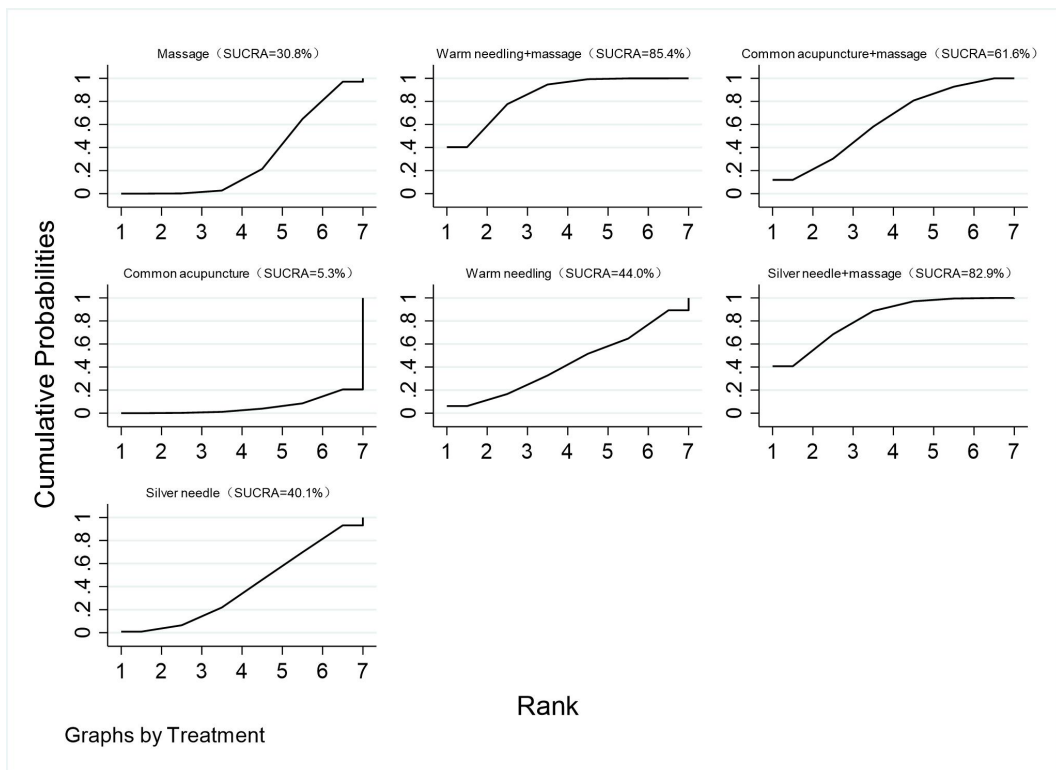

Figure S6 Sucra of WOMAC stiffness score



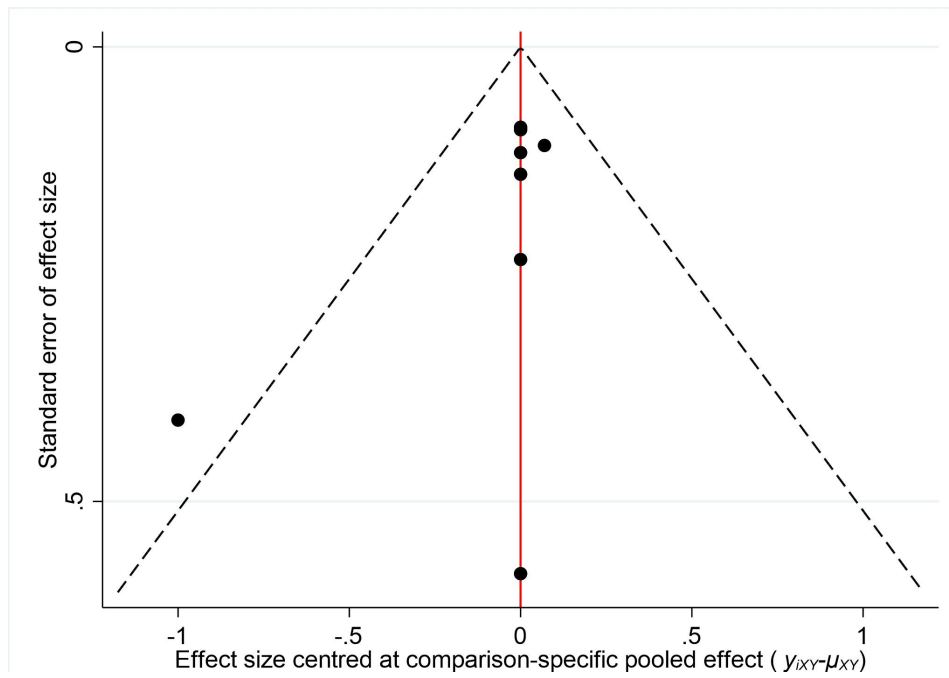

**Figure S7 The funnel plot of WOMAC stiffness score**

**Table S3 Network Meta-analysis of WOMAC Stiffness Scores**

| Interventions                   | Warm needling +<br>massage           | Silver needle +<br>massage           | Common<br>acupuncture<br>+<br>massage | Warm needle           | Silver needle         | Massage               | Common<br>acupuncture |
|---------------------------------|--------------------------------------|--------------------------------------|---------------------------------------|-----------------------|-----------------------|-----------------------|-----------------------|
| Warm needling +<br>massage      | 0                                    |                                      |                                       |                       |                       |                       |                       |
| Silver needle +<br>massage      | -0.06 (-1.81,1.68)                   | 0                                    |                                       |                       |                       |                       |                       |
| Common acupuncture<br>+ massage | -0.66 (-2.39,1.07)                   | -0.60 (-2.55,1.35)                   | 0                                     |                       |                       |                       |                       |
| Warm needle                     | -1.18 (-2.95,0.59)                   | -1.12 (-3.61,1.37)                   | -0.52 (-3.00,1.96)                    | 0                     |                       |                       |                       |
| Silver needle                   | -1.26 (-3.00,0.48)                   | -1.20 (-2.57,0.17)                   | -0.60 (-2.54,1.34)                    | -0.08<br>(-2.56,2.40) | 0                     |                       |                       |
| Massage                         | -1.46<br>(-2.52,-0.40) <sup>1)</sup> | -1.40<br>(-2.79,-0.01) <sup>1)</sup> | -0.80 (-2.17,0.57)                    | -0.28<br>(-2.35,1.78) | -0.20<br>(-1.58,1.18) | 0                     |                       |
| Common acupuncture              | -2.84<br>(-5.09,-0.59) <sup>1)</sup> | -2.78<br>(-5.20,-0.36) <sup>1)</sup> | -2.18 (-3.62,-0.74) <sup>1)</sup>     | -1.66<br>(-4.52,1.20) | -1.58<br>(-4.00,0.84) | -1.38<br>(-3.36,0.60) | 0                     |

Note: The difference between the two groups had statistical significance <sup>1)</sup> P < 0.05.

**The Above is the WOMAC stiffness score**

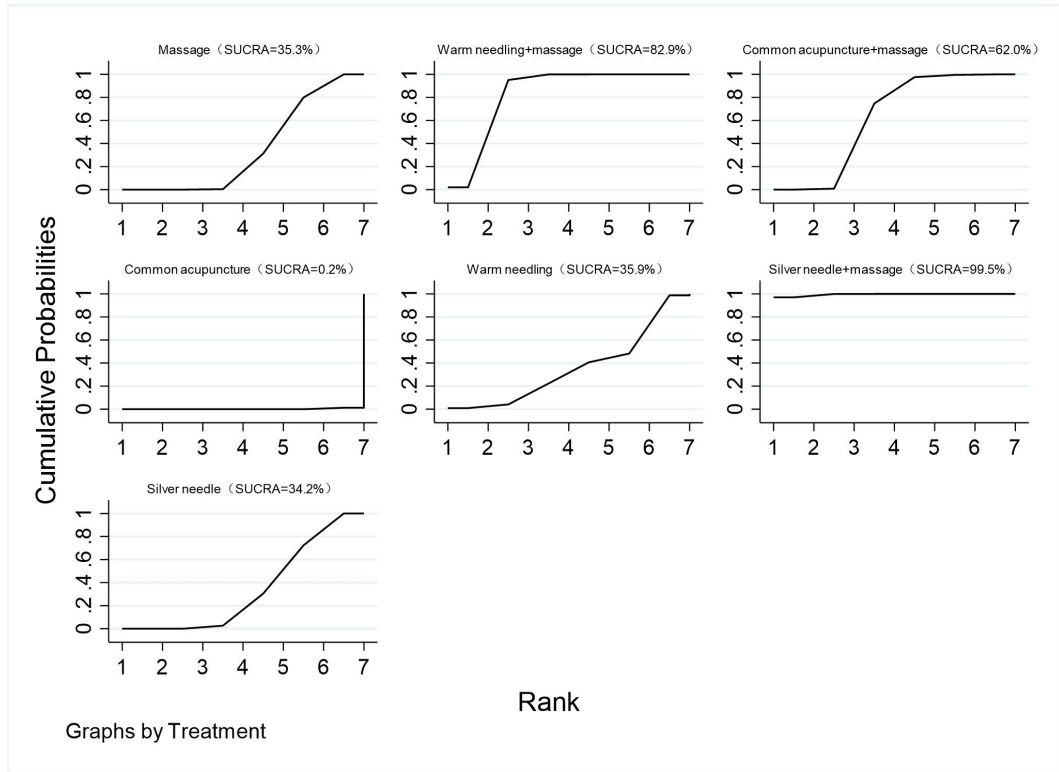

**Figure S8 Sucra of WOMAC joint function score**

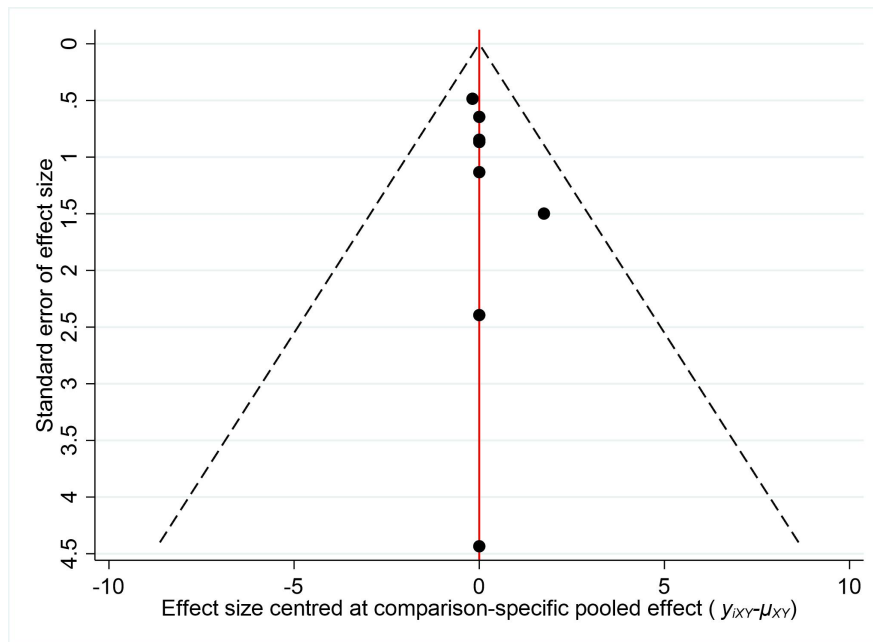

**Figure S9 The funnel plot of WOMAC joint function score**

Table S4 Network Meta-analysis of WOMAC Joint Function Score

| Interventions                   | Silver needle +<br>massage              | Warm needling +<br>massage              | Common acupuncture +<br>massage         | Warm needle                            | Massage                                | Silver needle                          | Common<br>acupuncture |
|---------------------------------|-----------------------------------------|-----------------------------------------|-----------------------------------------|----------------------------------------|----------------------------------------|----------------------------------------|-----------------------|
| Silver needle +<br>massage      | 0                                       |                                         |                                         |                                        |                                        |                                        |                       |
| Warm needling +<br>massage      | -3.06 (-6.00,-0.13) <sup>1)</sup>       | 0                                       |                                         |                                        |                                        |                                        |                       |
| Common acupuncture +<br>massage | -7.40 (-10.76,-4.04) <sup>1)</sup>      | -4.34 (-7.79,-0.88) <sup>1)</sup>       | 0                                       |                                        |                                        |                                        |                       |
| Warm needle                     | -11.03<br>(-20.34,-1.73) <sup>1)</sup>  | -7.97 (-16.80,0.86)                     | -3.63 (-13.11,5.84)                     | 0                                      |                                        |                                        |                       |
| Massage                         | -10.40<br>(-12.40,-8.40) <sup>1)</sup>  | -7.34 (-9.48,-5.19) <sup>1)</sup>       | -3.00 (-5.71,-0.29) <sup>1)</sup>       | 0.63 (-8.45,9.72)                      | 0                                      |                                        |                       |
| Silver needle                   | -10.50<br>(-12.77,-8.23) <sup>1)</sup>  | -7.44 (-10.58,-4.29) <sup>1)</sup>      | -3.10 (-6.65,0.45)                      | 0.53 (-8.84,9.91)                      | -0.10 (-2.40,2.20)                     | 0                                      |                       |
| Common acupuncture              | -23.34<br>(-29.32,-17.36) <sup>1)</sup> | -20.28<br>(-26.30,-14.25) <sup>1)</sup> | -15.94<br>(-20.88,-11.00) <sup>1)</sup> | -12.31<br>(-22.99,-1.62) <sup>1)</sup> | -12.94<br>(-18.57,-7.31) <sup>1)</sup> | -12.84<br>(-18.92,-6.76) <sup>1)</sup> | 0                     |

Note: The difference between the two groups had statistical significance <sup>1)</sup> P < 0.05.

**Above is the WOMAC joint function score**

## The results of sensitivity Analyses

### The results of the sensitivity analysis of excluded non-conventional massage

#### Clinical effective rate

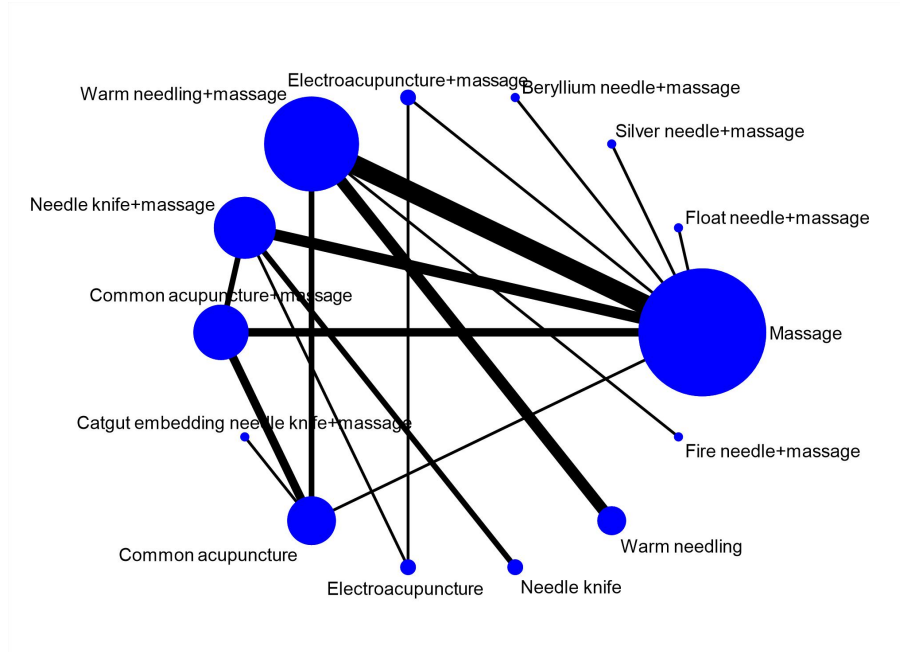

Figure S10 Network relationship diagram of clinical effective rate

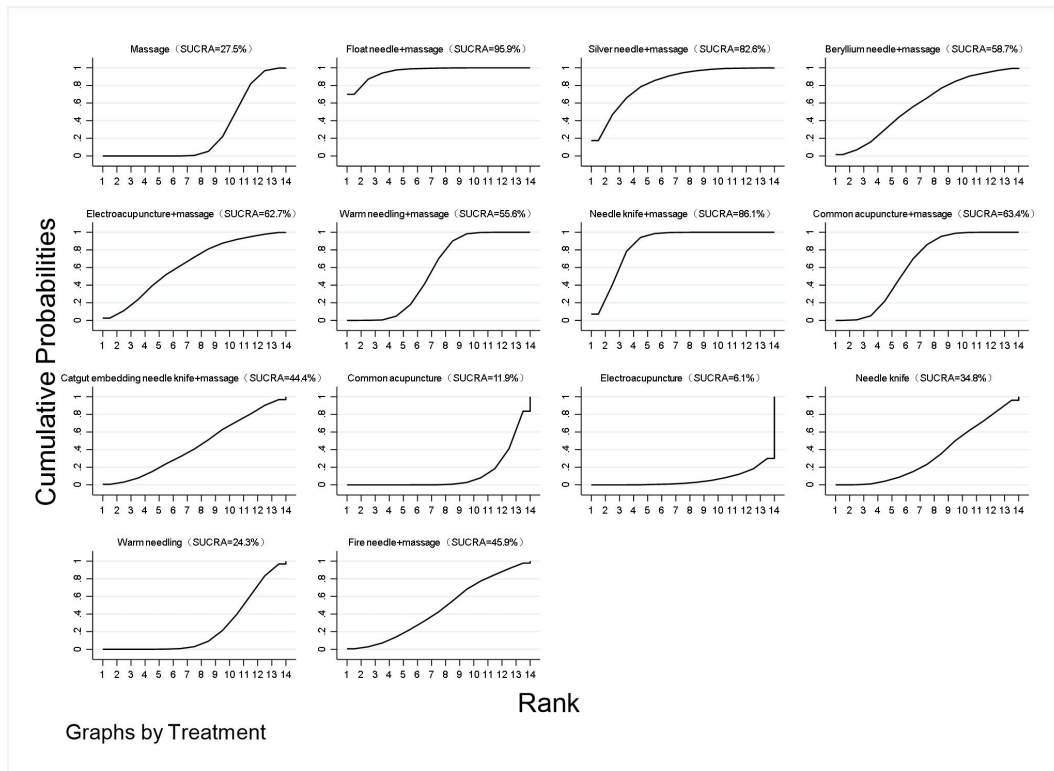

Figure S11 Sucra of clinical effective rate

Table S5 Network Meta-analysis of clinical effective rate

| Interventions                      | Float needle +<br>massage        | Needle knife +<br>massage     | Silver needle +<br>massage | Common<br>acupuncture +<br>massage | Electroacupuncture<br>+ massage | Beryllium needle<br>+ massage | Warm needling +<br>massage |
|------------------------------------|----------------------------------|-------------------------------|----------------------------|------------------------------------|---------------------------------|-------------------------------|----------------------------|
| Float needle +<br>massage          | 0                                |                               |                            |                                    |                                 |                               |                            |
| Needle knife +<br>massage          | 2.51 (0.46,13.78)                | 0                             |                            |                                    |                                 |                               |                            |
| Silver needle +<br>massage         | 2.46 (0.27,22.44)                | 0.98 (0.17,5.51)              | 0                          |                                    |                                 |                               |                            |
| Common<br>acupuncture +<br>massage | 5.84 (1.08,31.63) <sup>1</sup>   | 2.32 (1.07,5.04) <sup>1</sup> | 2.37 (0.43,13.23)          | 0                                  |                                 |                               |                            |
| Electroacupuncture<br>+ massage    | 5.56 (0.60,51.14)                | 2.21 (0.41,11.88)             | 2.26 (0.24,21.25)          | 0.95 (0.17,5.25)                   | 0                               |                               |                            |
| Beryllium needle +<br>massage      | 6.27 (0.76,52.06)                | 2.50 (0.50,12.43)             | 2.55 (0.30,21.65)          | 1.07 (0.22,5.28)                   | 1.13 (0.13,9.66)                | 0                             |                            |
| Warm needling +<br>massage         | 7.35 (1.46,36.88) <sup>1</sup>   | 2.92 (1.28,6.67) <sup>1</sup> | 2.99 (0.58,15.44)          | 1.26 (0.57,2.78)                   | 1.32 (0.25,6.87)                | 1.17 (0.26,5.30)              | 0                          |
| Fire needle +<br>massage           | 9.53 (1.09,83.04) <sup>1</sup>   | 3.79 (0.72,20.00)             | 3.88 (0.44,34.52)          | 1.63 (0.31,8.47)                   | 1.71 (0.19,15.33)               | 1.52 (0.19,12.28)             | 1.30 (0.31,5.50)           |
| Catgut embedding                   | 10.48 (1.06,103.89) <sup>1</sup> | 4.17 (0.69,25.10)             | 4.26 (0.42,43.14)          | 1.80 (0.32,10.05)                  | 1.89 (0.19,19.10)               | 1.67 (0.18,15.43)             | 1.43 (0.26,7.89)           |

|                           |                                   |                                   |                                   |                                 |                                  |                   |                                 |  |
|---------------------------|-----------------------------------|-----------------------------------|-----------------------------------|---------------------------------|----------------------------------|-------------------|---------------------------------|--|
| needle knife +<br>massage |                                   |                                   |                                   |                                 |                                  |                   |                                 |  |
| Needle knife              | 13.81 (1.76,108.01) <sup>1)</sup> | 5.49 (1.73,17.46) <sup>1)</sup>   | 5.62 (0.70,44.95)                 | 2.37 (0.59,9.51)                | 2.48 (0.32,19.13)                | 2.20 (0.30,15.90) | 1.88 (0.45,7.81)                |  |
| Massage                   | 16.00 (3.40,75.30) <sup>1)</sup>  | 6.37 (3.15,12.89) <sup>1)</sup>   | 6.51 (1.34,31.57) <sup>1)</sup>   | 2.74 (1.39,5.39) <sup>1)</sup>  | 2.88 (0.59,14.12)                | 2.55 (0.60,10.78) | 2.18 (1.39,3.42) <sup>1)</sup>  |  |
| Warm needling             | 17.64 (3.17,98.30) <sup>1)</sup>  | 7.02 (2.54,19.43) <sup>1)</sup>   | 7.18 (1.25,41.09) <sup>1)</sup>   | 3.02 (1.12,8.13) <sup>1)</sup>  | 3.17 (0.55,18.34)                | 2.81 (0.56,14.23) | 2.40 (1.24,4.65) <sup>1)</sup>  |  |
| Common                    | 27.94 (4.81,162.44) <sup>1)</sup> | 11.12 (3.97,31.11) <sup>1)</sup>  | 11.37 (1.90,67.87) <sup>1)</sup>  | 4.79 (1.95,11.73) <sup>1)</sup> | 5.03 (0.84,30.06)                | 4.45 (0.84,23.58) | 3.80 (1.59,9.11) <sup>1)</sup>  |  |
| acupuncture               |                                   |                                   |                                   |                                 |                                  |                   |                                 |  |
| Electroacupuncture        | 56.50 (5.07,629.79) <sup>1)</sup> | 22.48 (3.77,134.18) <sup>1)</sup> | 22.99 (2.02,261.26) <sup>1)</sup> | 9.68 (1.45,64.81) <sup>1)</sup> | 10.17 (1.35,76.78) <sup>1)</sup> | 9.01 (0.86,93.84) | 7.69 (1.15,51.39) <sup>1)</sup> |  |

**Table continued**

| Interventions                                 | Fire needle +<br>massage | Catgut embedding<br>needle knife +<br>massage | Needle knife      | Massage           | Warm needling     | Common<br>acupuncture | Electroacupuncture |
|-----------------------------------------------|--------------------------|-----------------------------------------------|-------------------|-------------------|-------------------|-----------------------|--------------------|
| Float needle +<br>massage                     |                          |                                               |                   |                   |                   |                       |                    |
| Needle knife +<br>massage                     |                          |                                               |                   |                   |                   |                       |                    |
| Silver needle +<br>massage                    |                          |                                               |                   |                   |                   |                       |                    |
| Common<br>acupuncture +<br>massage            |                          |                                               |                   |                   |                   |                       |                    |
| Electroacupuncture<br>+ massage               |                          |                                               |                   |                   |                   |                       |                    |
| Beryllium needle +<br>massage                 |                          |                                               |                   |                   |                   |                       |                    |
| Warm needling +<br>massage                    |                          |                                               |                   |                   |                   |                       |                    |
| Fire needle +<br>massage                      | 0                        |                                               |                   |                   |                   |                       |                    |
| Catgut embedding<br>needle knife +<br>massage | 1.10 (0.12,10.32)        | 0                                             |                   |                   |                   |                       |                    |
| Needle knife                                  | 1.45 (0.19,11.02)        | 1.32 (0.16,11.15)                             | 0                 |                   |                   |                       |                    |
| Massage                                       | 1.68 (0.37,7.63)         | 1.53 (0.28,8.30)                              | 1.16 (0.30,4.49)  | 0                 |                   |                       |                    |
| Warm needling                                 | 1.85 (0.38,9.06)         | 1.68 (0.27,10.35)                             | 1.28 (0.27,5.97)  | 1.10 (0.52,2.32)  | 0                 |                       |                    |
| Common<br>acupuncture                         | 2.93 (0.54,15.86)        | 2.67 (0.61,11.61)                             | 2.02 (0.43,9.52)  | 1.75 (0.76,4.03)  | 1.58 (0.55,4.59)  | 0                     |                    |
| Electroacupuncture                            | 5.93 (0.55,64.49)        | 5.39 (0.45,64.78)                             | 4.09 (0.49,34.35) | 3.53 (0.56,22.41) | 3.20 (0.44,23.42) | 2.02 (0.27,15.00)     | 0                  |

Note: The difference between the two groups had statistical significance <sup>1)</sup>P < 0.05.

### Visual Analogue Scale

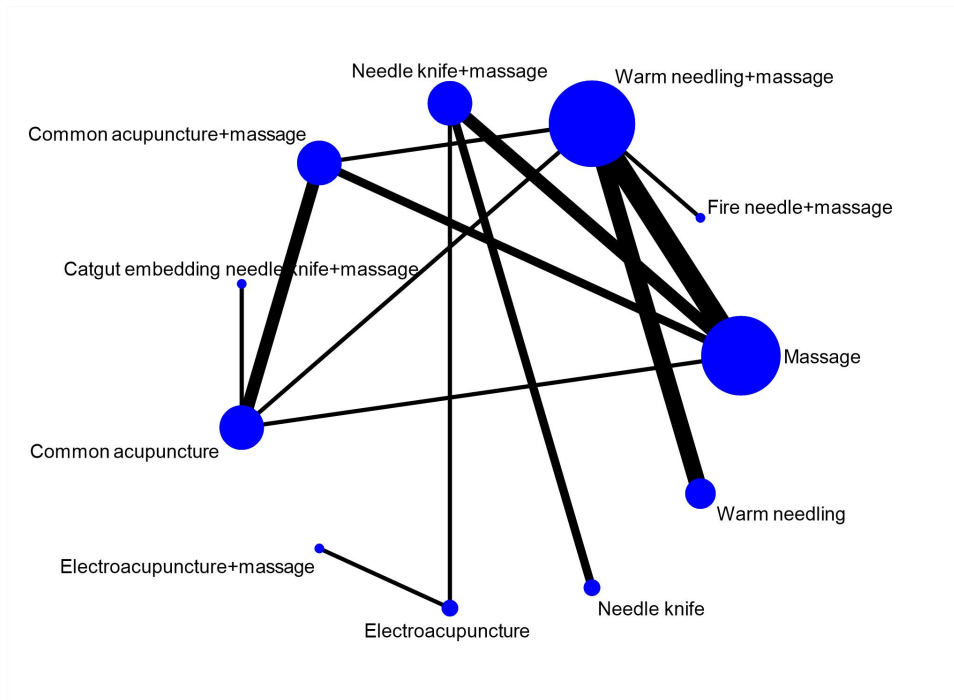

**Figure S12 Network relationship diagram of VAS**

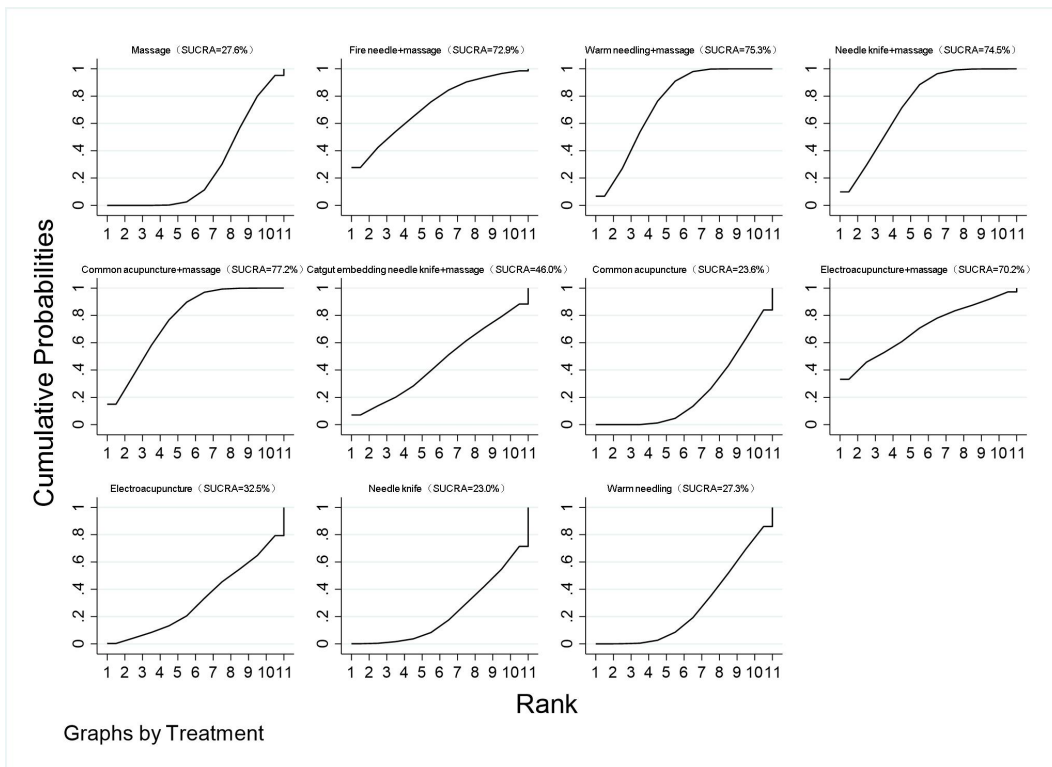

**Figure S13 Sucra of VAS**

Table S6 Network Meta-analysis of VAS

| Interventions                                 | Common<br>acupuncture +<br>massage | Warm needling +<br>massage        | Needle knife +<br>massage         | Fire needle +<br>massage | Electroacupuncture<br>+ massage |
|-----------------------------------------------|------------------------------------|-----------------------------------|-----------------------------------|--------------------------|---------------------------------|
| Common<br>acupuncture +<br>massage            | 0                                  |                                   |                                   |                          |                                 |
| Warm needling +<br>massage                    | -0.09 (-1.30,1.13)                 | 0                                 |                                   |                          |                                 |
| Needle knife +<br>massage                     | -0.13 (-1.86,1.60)                 | -0.04 (-1.56,1.47)                | 0                                 |                          |                                 |
| Fire needle +<br>massage                      | 0.02 (-2.54,2.59)                  | 0.11 (-2.15,2.37)                 | 0.15 (-2.56,2.87)                 | 0                        |                                 |
| Electroacupuncture<br>+ massage               | -0.05 (-3.57,3.46)                 | 0.03 (-3.38,3.45)                 | 0.08 (-2.99,3.14)                 | -0.08 (-4.17,4.02)       | 0                               |
| Catgut embedding<br>needle knife +<br>massage | -1.14 (-3.66,1.38)                 | -1.05 (-3.66,1.55)                | -1.01 (-3.90,1.88)                | -1.16 (-4.61,2.28)       | -1.09 (-5.30,3.12)              |
| Electroacupuncture                            | -1.65 (-4.43,1.13)                 | -1.57 (-4.22,1.09)                | -1.52 (-3.70,0.66)                | -1.68 (-5.16,1.81)       | -1.60 (-3.75,0.56)              |
| Massage                                       | -1.73 (-2.91,-0.56) <sup>1)</sup>  | -1.65 (-2.48,-0.81) <sup>1)</sup> | -1.60 (-2.86,-0.34) <sup>1)</sup> | -1.75 (-4.16,0.65)       | -1.68 (-4.99,1.63)              |
| Warm needling                                 | -1.76 (-3.37,-0.15) <sup>1)</sup>  | -1.67 (-2.75,-0.60) <sup>1)</sup> | -1.63 (-3.46,0.20)                | -1.78 (-4.29,0.72)       | -1.71 (-5.27,1.86)              |
| Common<br>acupuncture                         | -1.88 (-3.03,-0.73) <sup>1)</sup>  | -1.79 (-3.12,-0.47) <sup>1)</sup> | -1.75 (-3.58,0.08)                | -1.90 (-4.52,0.71)       | -1.83 (-5.39,1.74)              |
| Needle knife                                  | -1.99 (-4.29,0.30)                 | -1.91 (-4.04,0.23)                | -1.86 (-3.37,-0.35) <sup>1)</sup> | -2.02 (-5.13,1.09)       | -1.94 (-5.36,1.48)              |

Table continued

| Interventions                                 | Catgut embedding<br>needle knife +<br>massage | Electroacupuncture | Massage | Warm needling | Common<br>acupuncture | Needle knife |
|-----------------------------------------------|-----------------------------------------------|--------------------|---------|---------------|-----------------------|--------------|
| Common<br>acupuncture +<br>massage            |                                               |                    |         |               |                       |              |
| Warm needling +<br>massage                    |                                               |                    |         |               |                       |              |
| Needle knife +<br>massage                     |                                               |                    |         |               |                       |              |
| Fire needle +<br>massage                      |                                               |                    |         |               |                       |              |
| Electroacupuncture<br>+ massage               |                                               |                    |         |               |                       |              |
| Catgut embedding<br>needle knife +<br>massage | 0                                             |                    |         |               |                       |              |
| Electroacupuncture                            | -0.51 (-4.13,3.11)                            | 0                  |         |               |                       |              |



|                    |                    |                    |                    |                    |                    |
|--------------------|--------------------|--------------------|--------------------|--------------------|--------------------|
| Massage            | -0.59 (-3.19,2.01) | -0.08 (-2.60,2.44) | 0                  |                    |                    |
| Warm needling      | -0.62 (-3.43,2.18) | -0.11 (-2.95,2.73) | -0.03 (-1.35,1.29) | 0                  |                    |
| Common acupuncture | -0.74 (-2.98,1.50) | -0.23 (-3.07,2.61) | -0.15 (-1.47,1.17) | -0.12 (-1.81,1.57) | 0                  |
| Needle knife       | -0.85 (-4.11,2.41) | -0.34 (-2.99,2.31) | -0.26 (-2.23,1.71) | -0.23 (-2.60,2.14) | -0.11 (-2.48,2.26) |

Note: The difference between the two groups had statistical significance <sup>1)</sup> P < 0.05.

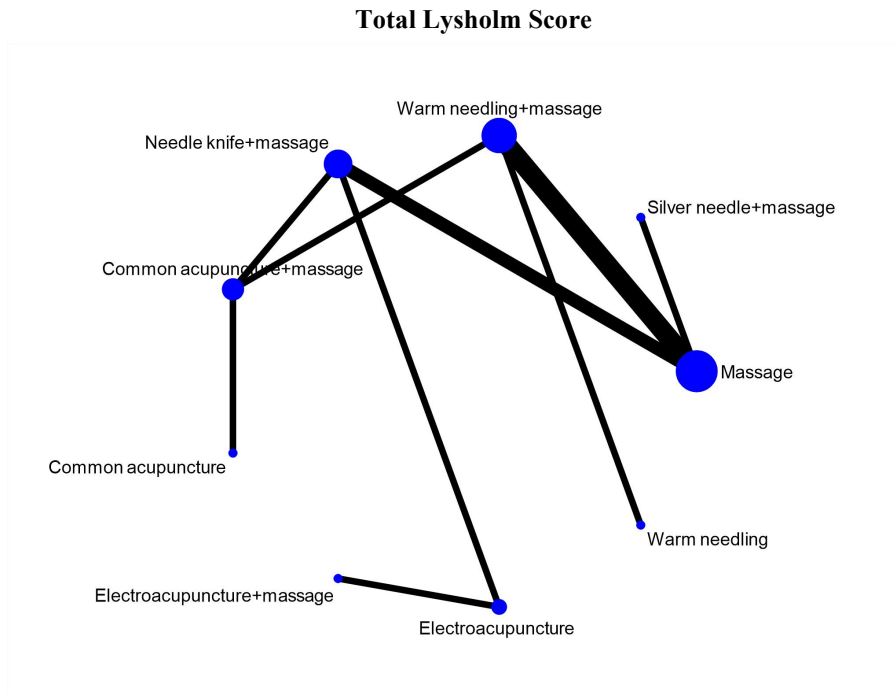

**Figure S14 Network relationship diagram of Total lysholm score**

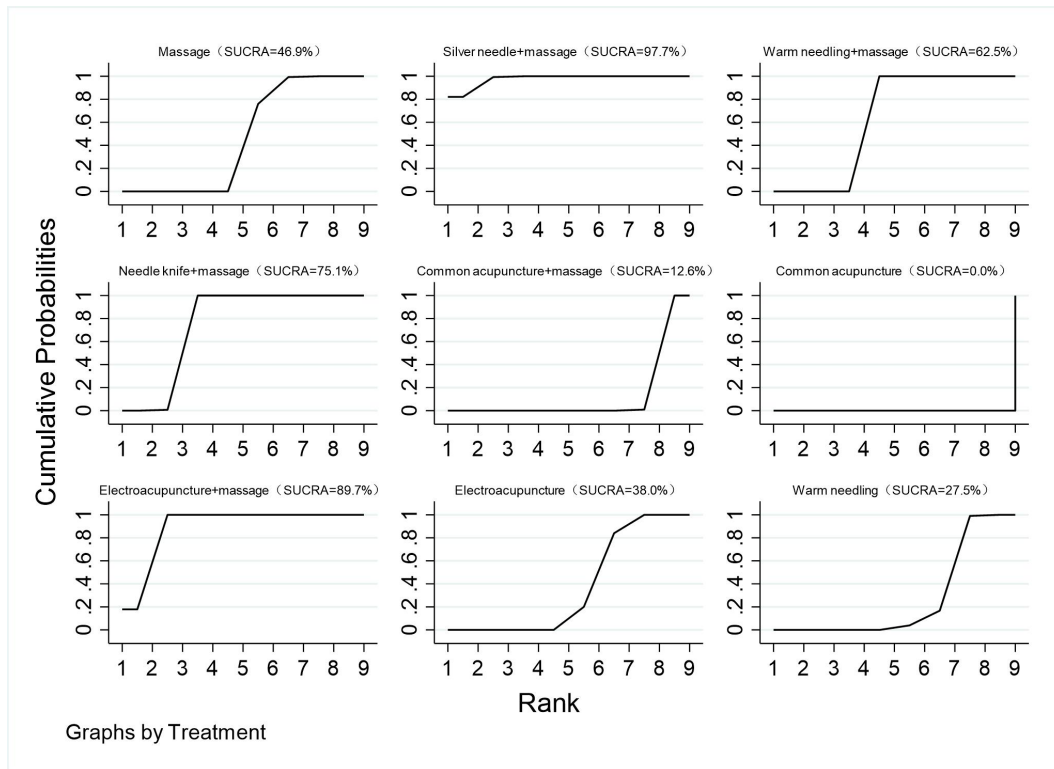

**Figure S15 Sucra of Total lysholm score**

**Table S7 Network Meta-analysis of Total Lysholm Score**

| Interventions                                | Silver needle +<br>massage           | Electroacupuncture<br>+ massage      | Needle knife +<br>massage            | Warm needling<br>+ massage           | Massage                              |
|----------------------------------------------|--------------------------------------|--------------------------------------|--------------------------------------|--------------------------------------|--------------------------------------|
| Silver needle +<br>massage                   | 0                                    |                                      |                                      |                                      |                                      |
| Electroacupuncture<br>+ massage              | 2.69<br>(-3.19,8.57)                 | 0                                    |                                      |                                      |                                      |
| Needle knife +<br>massage                    | 7.15<br>(1.52,12.78) <sup>1)</sup>   | 4.46 (2.77,6.15) <sup>1)</sup>       | 0                                    |                                      |                                      |
| Warm needling +<br>massage                   | 13.10<br>(7.74,18.46) <sup>1)</sup>  | 10.41<br>(7.81,13.02) <sup>1)</sup>  | 5.95<br>(3.97,7.94) <sup>1)</sup>    | 0                                    |                                      |
| Massage                                      | 18.81<br>(13.51,24.11) <sup>1)</sup> | 16.12<br>(13.58,18.67) <sup>1)</sup> | 11.66<br>(9.76,13.57) <sup>1)</sup>  | 5.71<br>(4.91,6.51) <sup>1)</sup>    | 0                                    |
| Electroacupuncture                           | 19.69<br>(13.99,25.39) <sup>1)</sup> | 17.00<br>(15.57,18.43) <sup>1)</sup> | 12.54<br>(11.65,13.43) <sup>1)</sup> | 6.59<br>(4.41,8.76) <sup>1)</sup>    | 0.88<br>(-1.22,2.98) <sup>1)</sup>   |
| Warm needling                                | 21.63<br>(15.45,27.82) <sup>1)</sup> | 18.94<br>(14.90,22.98) <sup>1)</sup> | 14.48<br>(10.81,18.16) <sup>1)</sup> | 8.53<br>(5.44,11.62) <sup>1)</sup>   | 2.82<br>(-0.37,6.01) <sup>1)</sup>   |
| Common<br>acupuncture +<br>massage + massage | 25.92<br>(20.26,31.58) <sup>1)</sup> | 23.23<br>(20.46,26.01) <sup>1)</sup> | 18.77<br>(16.57,20.98) <sup>1)</sup> | 12.82<br>(10.91,14.73) <sup>1)</sup> | 7.11<br>(5.12,9.10) <sup>1)</sup>    |
| Common<br>acupuncture +<br>massage           | 44.13<br>(37.06,51.19) <sup>1)</sup> | 41.44<br>(36.38,46.50) <sup>1)</sup> | 36.98<br>(32.21,41.75) <sup>1)</sup> | 31.03<br>(26.39,35.67) <sup>1)</sup> | 25.32<br>(20.65,29.99) <sup>1)</sup> |

**Table continued**

| Interventions                                | Electroacupuncture                | Warm needling                     | Common<br>acupuncture +<br>massage +<br>massage | Common<br>acupuncture |
|----------------------------------------------|-----------------------------------|-----------------------------------|-------------------------------------------------|-----------------------|
| Silver needle +<br>massage                   |                                   |                                   |                                                 |                       |
| Electroacupuncture<br>+ massage              |                                   |                                   |                                                 |                       |
| Needle knife +<br>massage                    |                                   |                                   |                                                 |                       |
| Warm needling +<br>massage                   |                                   |                                   |                                                 |                       |
| Massage                                      |                                   |                                   |                                                 |                       |
| Electroacupuncture                           | 0                                 |                                   |                                                 |                       |
| Warm needling                                | 1.94 (-1.83,5.72)                 | 0                                 |                                                 |                       |
| Common<br>acupuncture +<br>massage + massage | 6.23 (3.86,8.61) <sup>1)</sup>    | 4.29 (0.66,7.92) <sup>1)</sup>    | 0                                               |                       |
| Common<br>acupuncture                        | 24.44 (19.59,29.29) <sup>1)</sup> | 22.50 (16.92,28.07) <sup>1)</sup> | 18.21 (13.98,22.44) <sup>1)</sup>               | 0                     |

Note: The difference between the two groups had statistical significance <sup>1)</sup>P < 0.05.

## The results sensitivity Analyses of Risk of bias

### Clinical effective rate

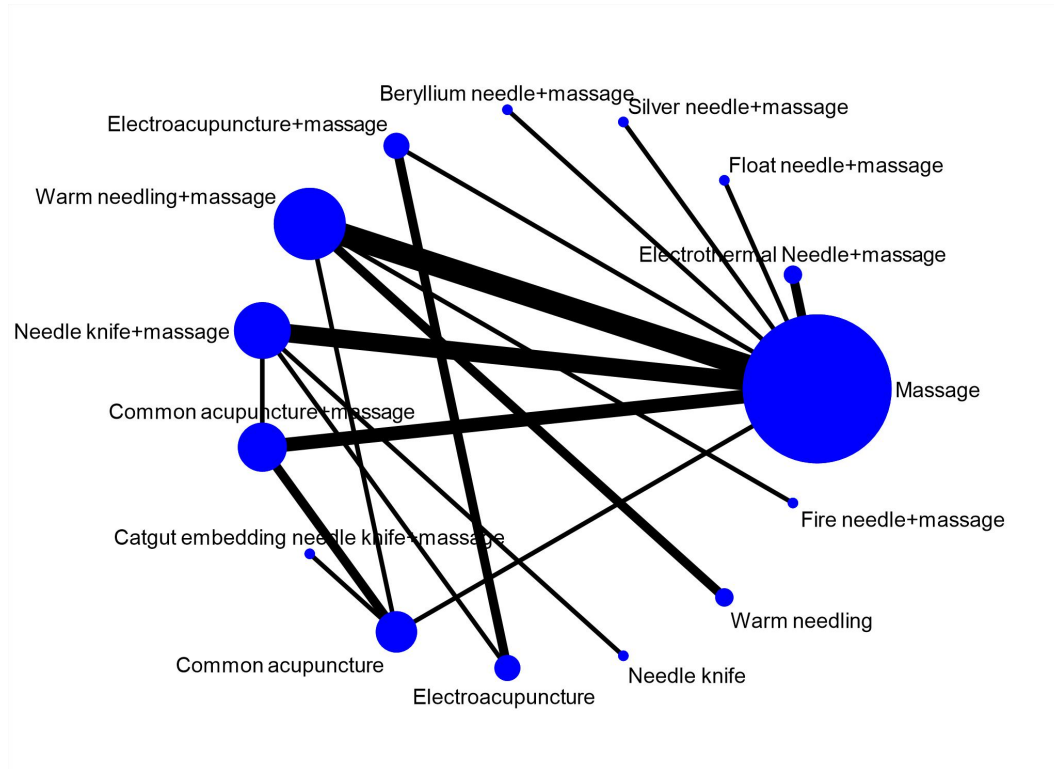

Figure S16 Network relationship diagram of Clinical effective rate

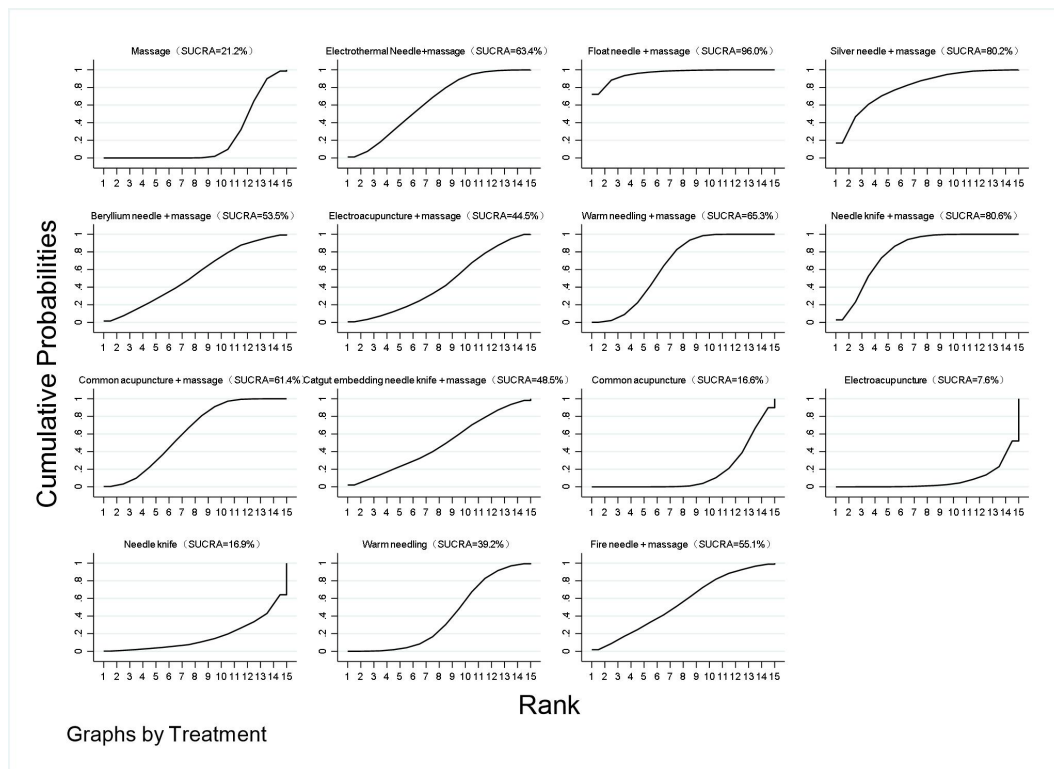

Figure S17 Sucra of Clinical effective rate

Table S8 Network Meta-analysis of clinical effective rate

| Interventions                                 | Float needle +<br>massage         | Needle knife +<br>massage       | Silver needle +<br>massage      | Warm needling +<br>massage     | Electrothermal<br>needle + massage | Common<br>acupuncture +<br>massage | Fire needle +<br>massage |
|-----------------------------------------------|-----------------------------------|---------------------------------|---------------------------------|--------------------------------|------------------------------------|------------------------------------|--------------------------|
| Float needle +<br>massage                     | 0                                 |                                 |                                 |                                |                                    |                                    |                          |
| Needle knife +<br>massage                     | 3.02 (0.57,15.98)                 | 0                               |                                 |                                |                                    |                                    |                          |
| Silver needle +<br>massage                    | 2.46 (0.28,21.66)                 | 0.81 (0.15,4.42)                | 0                               |                                |                                    |                                    |                          |
| Warm needling +<br>massage                    | 4.69 (0.92,23.95)                 | 1.55 (0.64,3.76)                | 1.91 (0.36,10.02)               | 0                              |                                    |                                    |                          |
| Electrothermal<br>needle + massage            | 4.84 (0.79,29.81)                 | 1.60 (0.48,5.31)                | 1.97 (0.31,12.45)               | 1.03 (0.33,3.26)               | 0                                  |                                    |                          |
| Common<br>acupuncture +<br>massage            | 5.05 (0.88,28.97)                 | 1.67 (0.63,4.43)                | 2.06 (0.35,12.11)               | 1.08 (0.39,2.95)               | 1.04 (0.28,3.86)                   | 0                                  |                          |
| Fire needle +<br>massage                      | 6.07 (0.70,52.71)                 | 2.01 (0.38,10.69)               | 2.47 (0.28,21.92)               | 1.30 (0.31,5.35)               | 1.25 (0.20,7.78)                   | 1.20 (0.21,6.84)                   | 0                        |
| Beryllium needle +<br>massage                 | 6.27 (0.78,50.15)                 | 2.08 (0.43,9.94)                | 2.55 (0.31,20.87)               | 1.34 (0.29,6.18)               | 1.30 (0.23,7.29)                   | 1.24 (0.24,6.48)                   | 1.03 (0.13,8.31)         |
| Catgut embedding<br>needle knife +<br>massage | 7.45 (0.74,74.70)                 | 2.46 (0.39,15.44)               | 3.03 (0.30,31.01)               | 1.59 (0.27,9.29)               | 1.54 (0.21,11.30)                  | 1.47 (0.24,8.89)                   | 1.23 (0.13,11.80)        |
| Electroacupuncture<br>+ massage               | 8.45 (1.04,68.62) <sup>1)</sup>   | 2.80 (0.63,12.38)               | 3.44 (0.41,28.55)               | 1.80 (0.38,8.50)               | 1.74 (0.30,10.00)                  | 1.67 (0.32,8.70)                   | 1.39 (0.17,11.36)        |
| Warm needle                                   | 9.30 (1.56,55.56) <sup>1)</sup>   | 3.08 (0.98,9.70)                | 3.78 (0.62,23.20)               | 1.99 (0.96,4.12)               | 1.92 (0.49,7.50)                   | 1.84 (0.53,6.38)                   | 1.53 (0.31,7.54)         |
| Massage                                       | 16.00 (3.49,73.41) <sup>1)</sup>  | 5.29 (2.70,10.38) <sup>1)</sup> | 6.51 (1.38,30.79) <sup>1)</sup> | 3.41 (1.91,6.12) <sup>1)</sup> | 3.30 (1.23,8.90) <sup>1)</sup>     | 3.17 (1.35,7.45) <sup>1)</sup>     | 2.63 (0.57,12.20)        |
| Needle knife                                  | 28.11 (1.90,416.11) <sup>1)</sup> | 9.30 (1.12,77.37) <sup>1)</sup> | 11.44 (0.76,172.27)             | 6.00 (0.60,59.61)              | 5.81 (0.51,66.19)                  | 5.57 (0.54,57.30)                  | 4.63 (0.31,68.74)        |
| Common                                        | 19.86 (3.29,119.79) <sup>1)</sup> | 6.57 (2.12,20.38) <sup>1)</sup> | 8.08 (1.31,50.02) <sup>1)</sup> | 4.24                           | 4.10                               | 3.93                               | 3.27 (0.57,18.70)        |

|                    |                                   |                                  |                                   |                                    |                                    |                                    |                   |
|--------------------|-----------------------------------|----------------------------------|-----------------------------------|------------------------------------|------------------------------------|------------------------------------|-------------------|
| acupuncture        |                                   |                                  |                                   | (1.53,11.71) <sup>1)</sup>         | (1.04,16.22) <sup>1)</sup>         | (1.35,11.45) <sup>1)</sup>         |                   |
| Electroacupuncture | 37.88 (4.34,330.44) <sup>1)</sup> | 12.53 (2.71,58.00) <sup>1)</sup> | 15.41 (1.73,137.38) <sup>1)</sup> | 8.09<br>(1.56,41.89) <sup>1)</sup> | 7.82<br>(1.25,48.82) <sup>1)</sup> | 7.50<br>(1.34,42.12) <sup>1)</sup> | 6.24 (0.71,54.69) |

---

|               |                  |                  |                    |             |         |              |             |                    |
|---------------|------------------|------------------|--------------------|-------------|---------|--------------|-------------|--------------------|
| Interventions | Beryllium needle | Catgut embedding | Electroacupuncture | Warm needle | Massage | Needle knife | Common      | Electroacupuncture |
|               | + massage        | needle knife +   | e + massage        |             |         |              | acupuncture | re                 |
|               |                  | massage          |                    |             |         |              |             |                    |

---

Float needle +

massage

Needle knife +

massage

Silver needle +

massage

Warm needling +

massage

Electrothermal

needle + massage

Common

acupuncture +

massage

Fire needle +

massage

Beryllium needle +

0

massage

Catgut embedding

needle knife + 1.19 (0.13,11.09) 0

massage

Electroacupuncture

1.35 (0.18,10.12) 1.13 (0.12,10.70) 0

+ massage

Warm needle

1.48 (0.27,8.08) 1.25 (0.18,8.44) 1.10 (0.20,6.11) 0

|                    |                   |                   |                                 |                   |                   |                   |                   |
|--------------------|-------------------|-------------------|---------------------------------|-------------------|-------------------|-------------------|-------------------|
| Massage            | 2.55 (0.62,10.49) | 2.15 (0.38,12.13) | 1.89 (0.45,7.97)                | 1.72 (0.68,4.38)  | 0                 |                   |                   |
| Needle knife       | 4.48 (0.32,62.46) | 3.78 (0.23,62.26) | 3.33 (0.25,44.30)               | 3.02 (0.27,33.62) | 1.76 (0.19,16.22) | 0                 |                   |
| Common acupuncture | 3.17 (0.58,17.42) | 2.67 (0.63,11.31) | 2.35 (0.42,13.09)               | 2.13 (0.61,7.46)  | 1.24 (0.48,3.22)  | 0.71 (0.06,7.80)  | 0                 |
| Electroacupuncture | 6.04 (0.75,48.85) | 5.09 (0.51,51.11) | 4.48 (1.38,14.58) <sup>1)</sup> | 4.07 (0.67,24.63) | 2.37 (0.51,11.04) | 1.35 (0.10,18.40) | 1.91 (0.32,11.53) |

**Table continued**

Note: The difference between the two groups had statistical significance <sup>1)</sup>P < 0.05.

### Visual Analogue Scale

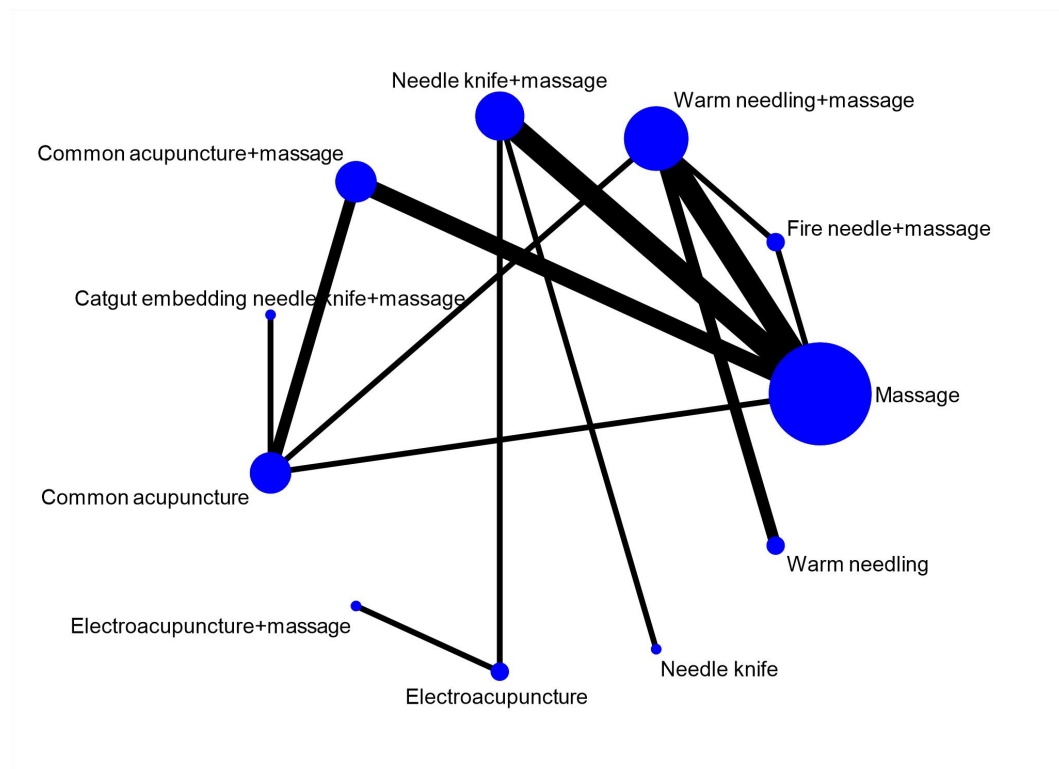

**Figure S18 Network relationship diagram of VAS**

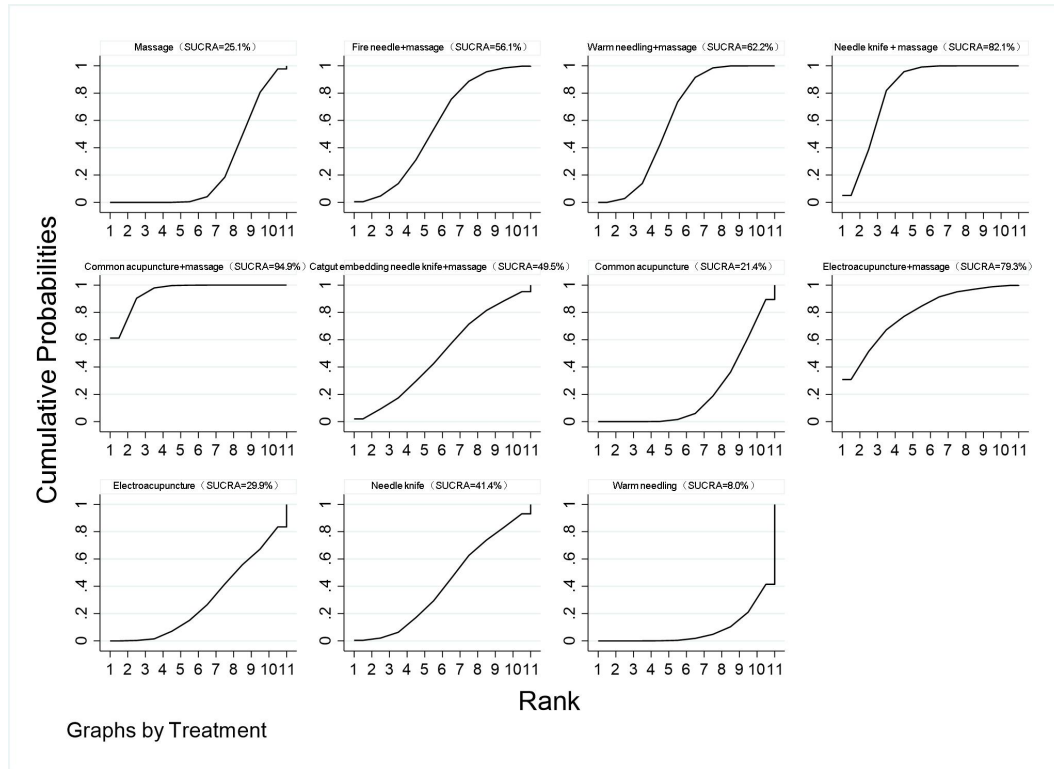

Figure S19 Sucra of VAS

Table S9 Network Meta-analysis of VAS

| Interventions                              | Common<br>acupuncture<br>+<br>massage | Needle knife +<br>massage            | Electroacupuncture<br>+<br>massage   | Warm needling +<br>massage | Fire needle +<br>massage | Catgut embedding<br>needle knife +<br>massage |
|--------------------------------------------|---------------------------------------|--------------------------------------|--------------------------------------|----------------------------|--------------------------|-----------------------------------------------|
| Common acupuncture +<br>massage            | 0                                     |                                      |                                      |                            |                          |                                               |
| Needle knife + massage                     | -0.60 (-1.57,0.38)                    | 0                                    |                                      |                            |                          |                                               |
| Electroacupuncture +<br>massage            | -0.52 (-2.57,1.54)                    | 0.08 (-1.73,1.89)                    | 0                                    |                            |                          |                                               |
| Warm needling + massage                    | -1.22 (-2.06,-0.38) <sup>1)</sup>     | -0.62 (-1.50,0.25)                   | -0.70 (-2.72,1.31)                   | 0                          |                          |                                               |
| Fire needle + massage                      | -1.37 (-2.56,-0.17) <sup>1)</sup>     | -0.77 (-1.97,0.43)                   | -0.85 (-3.03,1.32)                   | -0.15 (-1.15,0.85)         | 0                        |                                               |
| Catgut embedding needle<br>knife + massage | -1.56 (-3.19,0.07)                    | -0.96 (-2.72,0.79)                   | -1.04 (-3.57,1.48)                   | -0.34 (-1.99,1.30)         | -0.19 (-2.06,1.68)       | 0                                             |
| Needle knife                               | -1.77 (-3.35,-0.18) <sup>1)</sup>     | -1.17 (-2.42,0.08)                   | -1.25 (-3.45,0.95)                   | -0.55 (-2.07,0.98)         | -0.40 (-2.13,1.33)       | -0.21 (-2.36,1.95)                            |
| Electroacupuncture                         | -2.12 (-3.74,-0.49) <sup>1)</sup>     | -1.52<br>(-2.82,-0.22) <sup>1)</sup> | -1.60<br>(-2.86,-0.34) <sup>1)</sup> | -0.90 (-2.47,0.67)         | -0.75 (-2.52,1.02)       | -0.56 (-2.75,1.63)                            |



|                    |                                   |                                      |                                      |                                   |                                      |                    |
|--------------------|-----------------------------------|--------------------------------------|--------------------------------------|-----------------------------------|--------------------------------------|--------------------|
| Massage            | -2.20 (-2.89,-1.50) <sup>1)</sup> | -1.60<br>(-2.28,-0.92) <sup>1)</sup> | -1.68 (-3.62,0.25)                   | -0.98 (-1.53,-0.43) <sup>1)</sup> | -0.83 (-1.82,0.16)                   | -0.64 (-2.26,0.98) |
| Common acupuncture | -2.30 (-3.13,-1.47) <sup>1)</sup> | -1.70<br>(-2.77,-0.64) <sup>1)</sup> | -1.78 (-3.88,0.32)                   | -1.08 (-1.94,-0.22) <sup>1)</sup> | -0.93 (-2.17,0.31)                   | -0.74 (-2.14,0.66) |
| Warm needling      | -2.82 (-4.02,-1.61) <sup>1)</sup> | -2.22<br>(-3.45,-0.99) <sup>1)</sup> | -2.30<br>(-4.49,-0.11) <sup>1)</sup> | -1.60 (-2.46,-0.73) <sup>1)</sup> | -1.45<br>(-2.77,-0.12) <sup>1)</sup> | -1.26 (-3.12,0.60) |

| Interventions                              | Needle knife       | Electroacupuncture | Massage            | Common acupuncture | Warm needling |
|--------------------------------------------|--------------------|--------------------|--------------------|--------------------|---------------|
| Common acupuncture +<br>massage            |                    |                    |                    |                    |               |
| Needle knife + massage                     |                    |                    |                    |                    |               |
| Electroacupuncture +<br>massage            |                    |                    |                    |                    |               |
| Warm needling + massage                    |                    |                    |                    |                    |               |
| Fire needle + massage                      |                    |                    |                    |                    |               |
| Catgut embedding needle<br>knife + massage |                    |                    |                    |                    |               |
| Needle knife                               | 0                  |                    |                    |                    |               |
| Electroacupuncture                         | -0.35 (-2.16,1.46) | 0                  |                    |                    |               |
| Massage                                    | -0.43 (-1.85,0.99) | -0.08 (-1.55,1.39) | 0                  |                    |               |
| Common acupuncture                         | -0.53 (-2.17,1.11) | -0.18 (-1.86,1.50) | -0.10 (-0.92,0.72) | 0                  |               |
| Warm needling                              | -1.05 (-2.80,0.70) | -0.70 (-2.49,1.09) | -0.62 (-1.65,0.41) | -0.52 (-1.74,0.70) | 0             |

Table continued

Note: The difference between the two groups had statistical significance <sup>1)</sup> P < 0.05.

### Total Lysholm Score

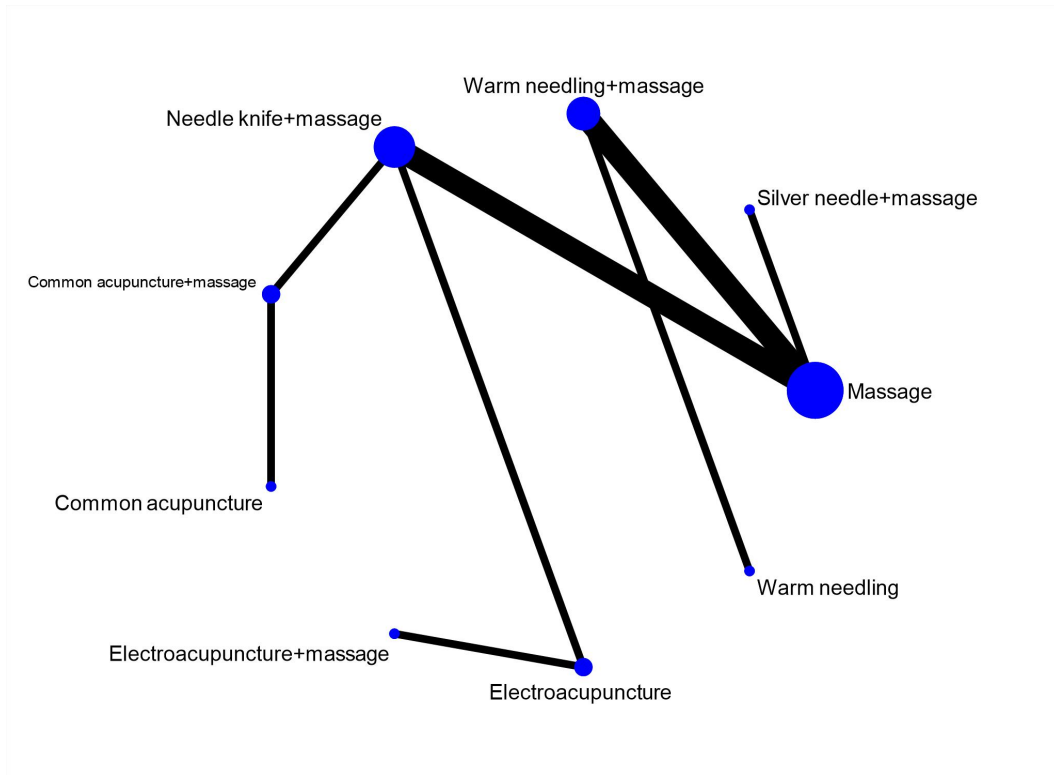

Figure S20 Network relationship diagram of Total lysholm score

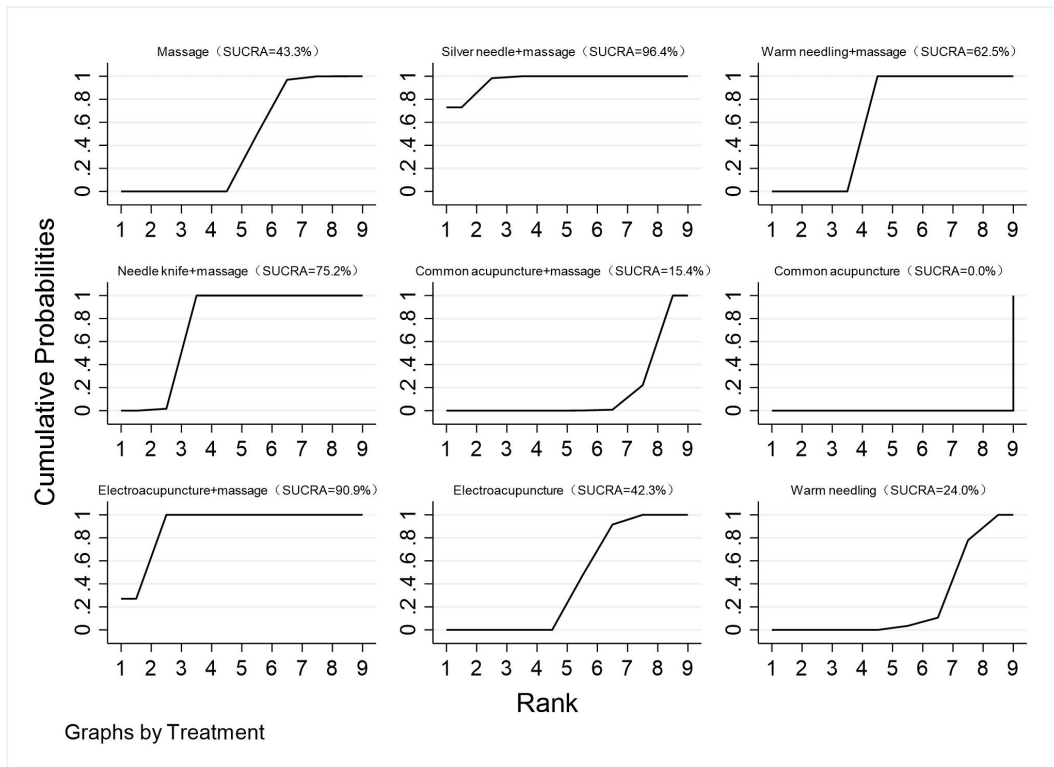

Figure S21 SUCRA of Total lysholm score

Table S10 Network Meta-analysis of Total Lysholm Score

| Interventions                      | Silver<br>needle<br>+<br>massage    | Electroacupunctu<br>re + massage | Needle knife +<br>massage        | Warm needling<br>+ massage       | Massage                          |
|------------------------------------|-------------------------------------|----------------------------------|----------------------------------|----------------------------------|----------------------------------|
| Silver needle +<br>massage         | 0                                   |                                  |                                  |                                  |                                  |
| Electroacupunctu<br>re + massage   | 1.83<br>(-4.12,7.79)                | 0                                |                                  |                                  |                                  |
| Needle knife +<br>massage          | 6.29<br>(0.58,12.00) <sup>1</sup>   | 4.46 (2.77,6.15) <sup>1</sup>    | 0                                |                                  |                                  |
| Warm needling +<br>massage         | 13.03<br>(7.66,18.40) <sup>1</sup>  | 11.20 (8.34,14.05) <sup>1</sup>  | 6.74 (4.43,9.04) <sup>1</sup>    | 0                                |                                  |
| Massage                            | 18.81<br>(13.51,24.11) <sup>1</sup> | 16.98 (14.26,19.69) <sup>1</sup> | 12.52 (10.39,14.65) <sup>1</sup> | 5.78 (4.90,6.66) <sup>1</sup>    | 0                                |
| Electroacupunctu<br>re             | 18.83<br>(13.05,24.61) <sup>1</sup> | 17.00 (15.57,18.43) <sup>1</sup> | 12.54 (11.65,13.43) <sup>1</sup> | 5.80 (3.33,8.27) <sup>1</sup>    | 0.02 (-2.28,2.33)                |
| Warm needle                        | 21.56<br>(15.36,27.76) <sup>1</sup> | 19.73 (15.52,23.93) <sup>1</sup> | 15.27 (11.41,19.12) <sup>1</sup> | 8.53 (5.44,11.62) <sup>1</sup>   | 2.75 (-0.46,5.96)                |
| Common<br>acupuncture +<br>massage | 23.48<br>(17.02,29.95) <sup>1</sup> | 21.65 (18.18,25.12) <sup>1</sup> | 17.19 (14.16,20.22) <sup>1</sup> | 10.45 (6.65,14.26) <sup>1</sup>  | 4.67 (0.97,8.38) <sup>1</sup>    |
| Common<br>acupuncture              | 41.69<br>(33.97,49.42) <sup>1</sup> | 39.86 (34.39,45.33) <sup>1</sup> | 35.40 (30.20,40.60) <sup>1</sup> | 28.66 (22.97,34.35) <sup>1</sup> | 22.88 (17.26,28.50) <sup>1</sup> |

Table continued

| Interventions                   | Electroacupuncture | Warm needle | Common<br>acupuncture +<br>massage | Common acupuncture |
|---------------------------------|--------------------|-------------|------------------------------------|--------------------|
| Silver needle +<br>massage      |                    |             |                                    |                    |
| Electroacupuncture<br>+ massage |                    |             |                                    |                    |
| Needle knife +                  |                    |             |                                    |                    |

massage

Warm needling +

massage

Massage

Electroacupuncture 0

Warm needle 2.73 (-1.23,6.68) 0

Common 0

acupuncture + 4.65 (1.49,7.81)<sup>1)</sup> 1.92 (-2.98,6.82)

massage

Common 0

22.86 (17.58,28.13)<sup>1)</sup> 20.13 (13.66,26.60)<sup>1)</sup> 18.21 (13.98,22.44)<sup>1)</sup>

acupuncture

---

Note: The difference between the two groups had statistical significance <sup>1)</sup> P < 0.05.

## Subgroup analysis

Table S11 Network Meta-analysis of Clinical effective rate(<3weeks group)

| Treatment | FTN+MA                               | NK+MA                               | SN+MA                                | CA+MA                              | BN+MA                | WN+MA                             | FN+MA                | MA                  | WN                  | CA |
|-----------|--------------------------------------|-------------------------------------|--------------------------------------|------------------------------------|----------------------|-----------------------------------|----------------------|---------------------|---------------------|----|
| FTN+MA    | 0                                    |                                     |                                      |                                    |                      |                                   |                      |                     |                     |    |
| NK+MA     | 2.54<br>(0.35,18.54)                 | 0                                   |                                      |                                    |                      |                                   |                      |                     |                     |    |
| SN+MA     | 2.46<br>(0.26,23.30)                 | 0.97<br>(0.13,7.26)                 | 0                                    |                                    |                      |                                   |                      |                     |                     |    |
| CA+MA     | 3.94<br>(0.61,25.40)                 | 1.55<br>(0.32,7.47)                 | 1.60<br>(0.24,10.60)                 | 0                                  |                      |                                   |                      |                     |                     |    |
| BN+MA     | 6.27<br>(0.73,54.13)                 | 2.47<br>(0.37,16.67)                | 2.55<br>(0.29,22.50)                 | 1.59<br>(0.27,9.42)                | 0                    |                                   |                      |                     |                     |    |
| WN+MA     | 8.63<br>(1.63,45.61) <sup>1)</sup>   | 3.41<br>(0.91,12.80)                | 3.51<br>(0.65,19.08)                 | 2.19<br>(0.73,6.56)                | 1.38<br>(0.29,6.58)  | 0                                 |                      |                     |                     |    |
| FN+MA     | 11.19<br>(1.21,103.32) <sup>1)</sup> | 4.41<br>(0.61,32.00)                | 4.55<br>(0.48,42.93)                 | 2.84<br>(0.45,17.82)               | 1.78<br>(0.21,15.30) | 1.30<br>(0.30,5.65)               | 0                    |                     |                     |    |
| MA        | 16.00<br>(3.31,77.33) <sup>1)</sup>  | 6.31<br>(1.87,21.27) <sup>1)</sup>  | 6.51<br>(1.31,32.41) <sup>1)</sup>   | 4.06<br>(1.50,11.01) <sup>1)</sup> | 2.55<br>(0.59,11.10) | 1.85<br>(1.08,3.17) <sup>1)</sup> | 1.43<br>(0.30,6.85)  | 0                   |                     |    |
| WN        | 21.69<br>(3.58,131.27) <sup>1)</sup> | 8.56<br>(1.91,38.23) <sup>1)</sup>  | 8.83<br>(1.42,54.81) <sup>1)</sup>   | 5.51<br>(1.49,20.34) <sup>1)</sup> | 3.46<br>(0.63,19.10) | 2.51<br>(1.11,5.71) <sup>1)</sup> | 1.94<br>(0.36,10.46) | 1.36<br>(0.57,3.24) | 0                   |    |
| CA        | 30.70<br>(3.58,263.10) <sup>1)</sup> | 12.11<br>(1.81,80.84) <sup>1)</sup> | 12.49<br>(1.43,109.40) <sup>1)</sup> | 7.80<br>(2.04,29.75) <sup>1)</sup> | 4.89<br>(0.62,38.87) | 3.56<br>(0.82,15.49)              | 2.74<br>(0.34,22.01) | 1.92<br>(0.45,8.27) | 1.42<br>(0.27,7.39) | 0  |

Note:FTN=floating needle; NK=needle knife; SN=silver needle; CA=common acupuncture; BN=beryllium needle; WN=warming needle; FN=fire needle; MA; massage

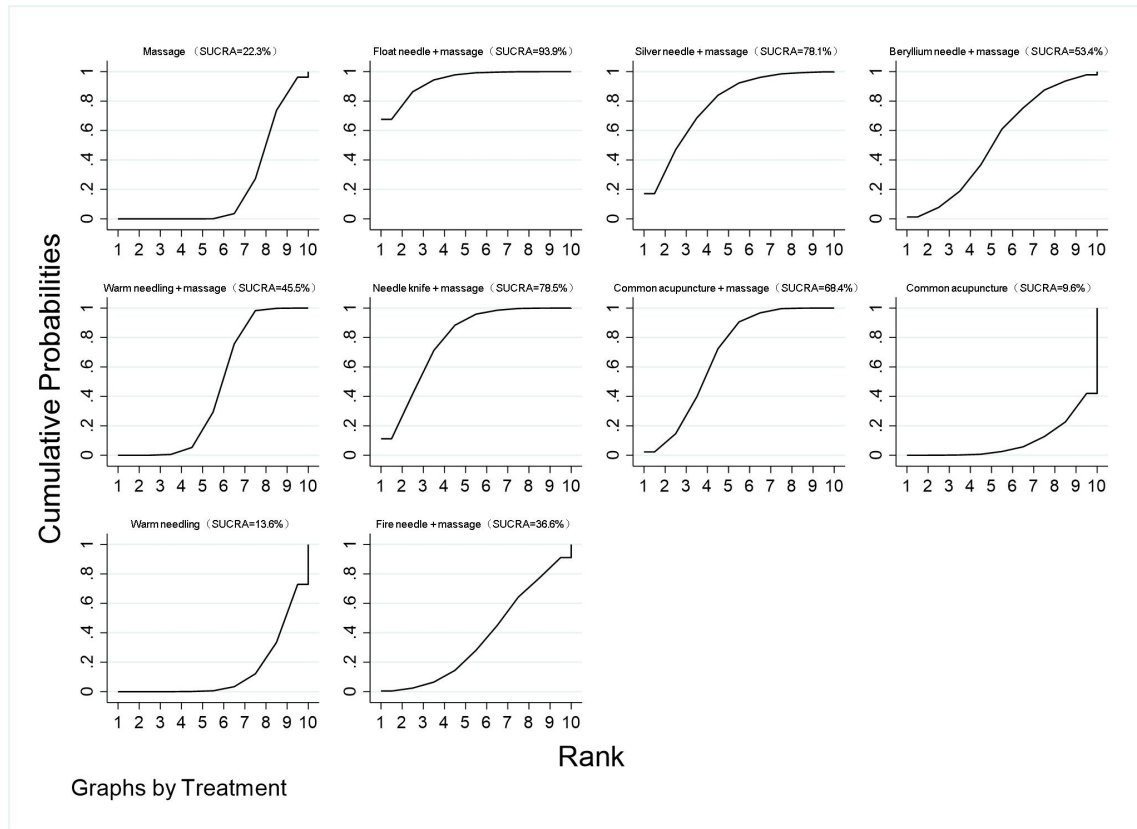

Figure S22 Sucra of Clinical effective rate(<3weeks group)

Table S12 Network Meta-analysis of Clinical effective rate( $\geq 3$ weeks group)

| Treatment | NK+MA                | WN+MA                | ETN+MA               | CENK+MA              | CA+MA               | EA+MA                | WN | MA | NK | CA | EA |
|-----------|----------------------|----------------------|----------------------|----------------------|---------------------|----------------------|----|----|----|----|----|
| NK+MA     | 0                    |                      |                      |                      |                     |                      |    |    |    |    |    |
| WN+MA     | 1.44<br>(0.51,4.10)  | 0                    |                      |                      |                     |                      |    |    |    |    |    |
| ETN+MA    | 1.50<br>(0.44,5.14)  | 1.04<br>(0.30,3.62)  | 0                    |                      |                     |                      |    |    |    |    |    |
| CENK+MA   | 2.17<br>(0.36,12.98) | 1.50<br>(0.22,10.36) | 1.44<br>(0.19,11.04) | 0                    |                     |                      |    |    |    |    |    |
| CA+MA     | 2.40<br>(1.05,5.47)  | 1.66<br>(0.52,5.31)  | 1.59<br>(0.42,6.02)  | 1.11<br>(0.17,7.03)  | 0                   |                      |    |    |    |    |    |
| EA+MA     | 2.68<br>(0.60,12.00) | 1.86<br>(0.37,9.43)  | 1.78<br>(0.31,10.24) | 1.24<br>(0.13,11.79) | 1.12<br>(0.22,5.70) | 0                    |    |    |    |    |    |
| WN        | 3.14<br>(0.51,19.48) | 2.17<br>(0.49,9.72)  | 2.09<br>(0.30,14.61) | 1.45<br>(0.13,16.71) | 1.31<br>(0.20,8.72) | 1.17<br>(0.13,10.67) | 0  |    |    |    |    |

|    |                                     |                                    |                                    |                      |                      |                                    |                       |                      |                      |                      |
|----|-------------------------------------|------------------------------------|------------------------------------|----------------------|----------------------|------------------------------------|-----------------------|----------------------|----------------------|----------------------|
| MA | 4.97<br>(2.41,10.27) <sup>1)</sup>  | 3.44<br>(1.62,7.30) <sup>1)</sup>  | 3.30<br>(1.23,8.90) <sup>1)</sup>  | 2.30<br>(0.39,13.62) | 2.07<br>(0.85,5.04)  | 1.85<br>(0.44,7.83)                | 1.58<br>(0.30, 8.46)  | 0                    |                      |                      |
| NK | 5.47<br>(1.76,17.04) <sup>1)</sup>  | 3.79<br>(0.81,17.73)               | 3.64<br>(0.68,19.37)               | 2.53<br>(0.30,21.06) | 2.28<br>(0.56,9.29)  | 2.04<br>(0.31,13.38)               | 1.74<br>(0.20, 14.96) | 1.10<br>(0.29,4.24)  | 0                    |                      |
| CA | 5.78<br>(2.01,16.63) <sup>1)</sup>  | 4.00<br>(1.11,14.43) <sup>1)</sup> | 3.84<br>(0.91,16.15)               | 2.67<br>(0.63,11.31) | 2.41<br>(0.76,7.64)  | 2.15<br>(0.38,12.14)               | 1.84<br>(0.26, 13.22) | 1.16<br>(0.41,3.29)  | 1.06<br>(0.22,4.98)  | 0                    |
| EA | 12.17<br>(2.62,56.60) <sup>1)</sup> | 8.43<br>(1.51,47.01) <sup>1)</sup> | 8.09<br>(1.29,50.73) <sup>1)</sup> | 5.62<br>(0.56,56.19) | 5.08<br>(0.94,27.42) | 4.54<br>(1.39,14.77) <sup>1)</sup> | 3.88<br>(0.40, 37.88) | 2.45<br>(0.52,11.48) | 2.22<br>(0.33,15.03) | 2.11<br>(0.35,12.66) |

Note: NK=needle knife; WN=warming needle; ETN=electrothermal needle; CENK=catgut embedding needle knife; CA=common acupuncture; EA=electroacupuncture; MA=message

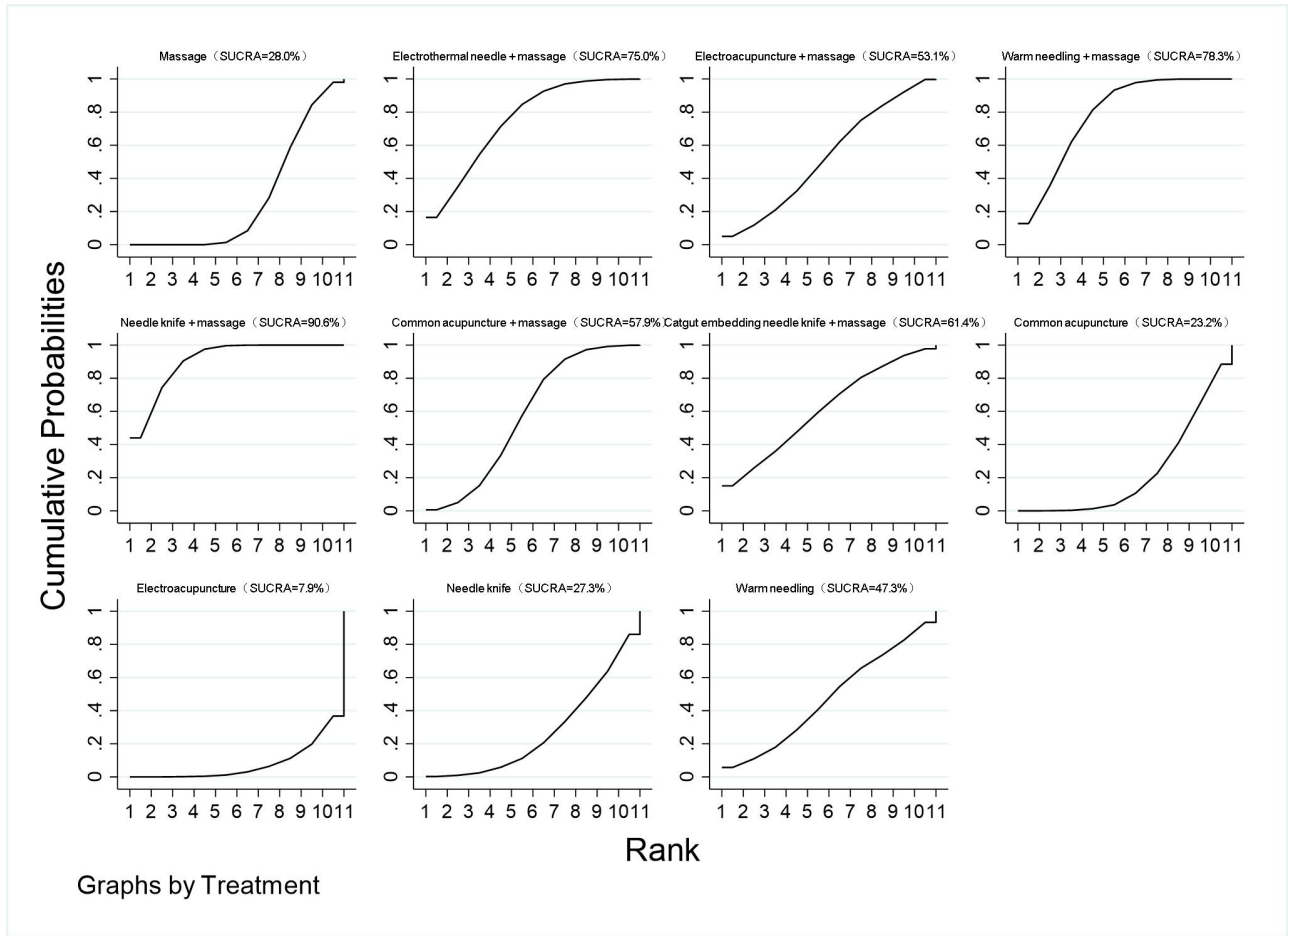

**Figure S23 Sucra of Clinical effective rate( $\geq 3$ weeks group)**



## Visual Analogue Scale(<3weeks group)

Table S13 Network Meta-analysis of VAS(<3weeks group)

| Treatment | CA+MA                 | NK+MA                                | WN+MA                                | FN+MA                 | CA                    | MA                    | WN |
|-----------|-----------------------|--------------------------------------|--------------------------------------|-----------------------|-----------------------|-----------------------|----|
| CA+MA     | 0                     |                                      |                                      |                       |                       |                       |    |
| NK+MA     | -0.16<br>(-2.73,2.41) | 0                                    |                                      |                       |                       |                       |    |
| WN+MA     | -0.53<br>(-2.84,1.79) | -0.37<br>(-2.05,1.31)                | 0                                    |                       |                       |                       |    |
| FN+MA     | -0.86<br>(-3.49,1.76) | -0.70<br>(-2.79,1.38)                | -0.34<br>(-1.87,1.20)                | 0                     |                       |                       |    |
| CA        | -1.82<br>(-3.91,0.27) | -1.66<br>(-4.97,1.65)                | -1.29<br>(-4.41,1.82)                | -0.96<br>(-4.31,2.40) | 0                     |                       |    |
| MA        | -1.89<br>(-4.03,0.25) | -1.73<br>(-3.16,-0.30) <sup>††</sup> | -1.36<br>(-2.25,-0.47) <sup>††</sup> | -1.03<br>(-2.55,0.50) | -0.07<br>(-3.06,2.92) | 0                     |    |
| WN        | -2.29<br>(-4.83,0.26) | -2.13<br>(-4.12,-0.14) <sup>††</sup> | -1.76<br>(-2.88,-0.64) <sup>††</sup> | -1.42<br>(-3.31,0.46) | -0.46<br>(-3.76,2.83) | -0.40<br>(-1.78,0.99) | 0  |

Note:CA=common acupuncture; NK=needle knife; WN=warming needle; FN=fire needle; MA=message

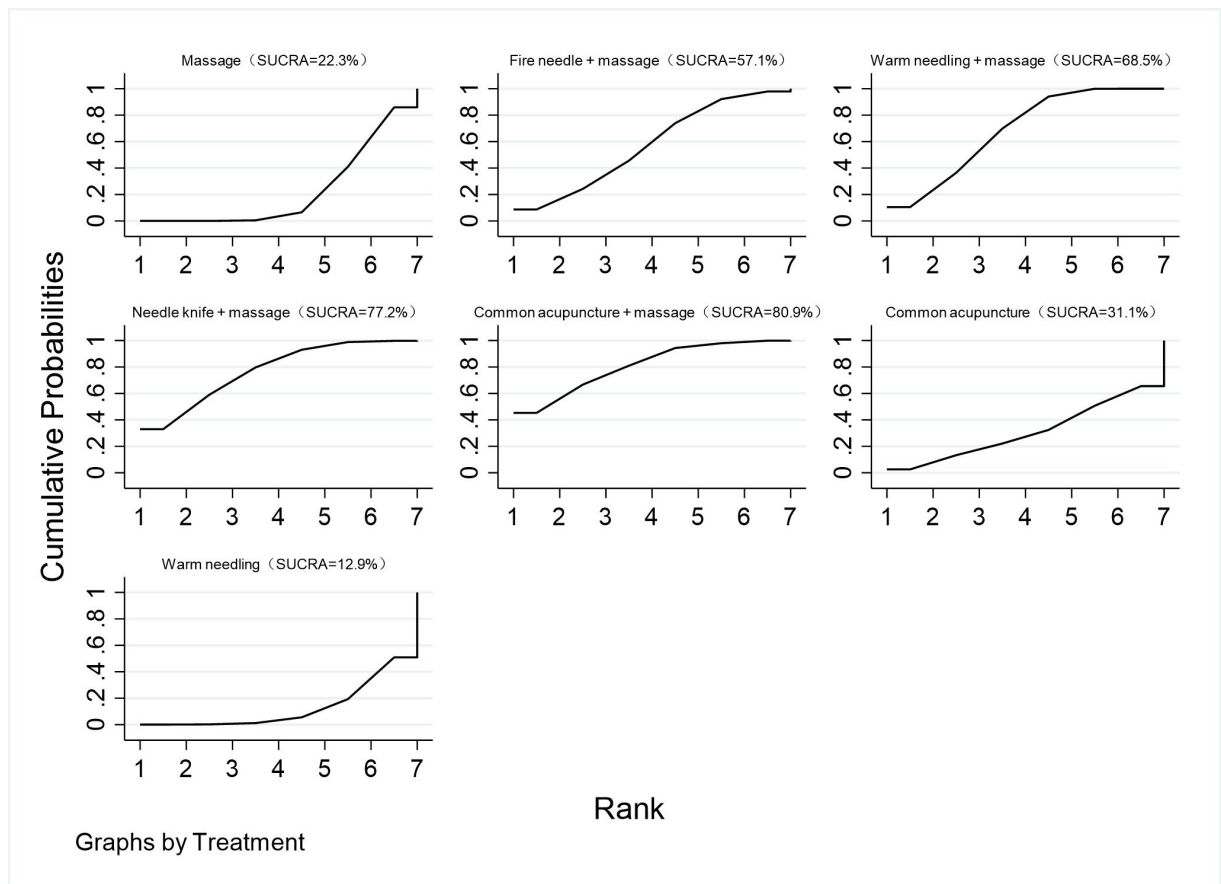

Figure S24 Sucra of VAS(<3weeks group)

## Visual Analogue Scale( $\geq 3$ weeks group)

Table S14 Network Meta-analysis of VAS( $\geq 3$ weeks group)

| Treatment | CA+MA                               | WN+MA                               | NK+MA                               | EA+MA                 | CENK+MA               | WN                    | EA                    | MA                    | CA                    | NK |
|-----------|-------------------------------------|-------------------------------------|-------------------------------------|-----------------------|-----------------------|-----------------------|-----------------------|-----------------------|-----------------------|----|
| CA+MA     | 0                                   |                                     |                                     |                       |                       |                       |                       |                       |                       |    |
| WN+MA     | -0.09<br>(-1.66,1.49)               | 0                                   |                                     |                       |                       |                       |                       |                       |                       |    |
| NK+MA     | -0.37<br>(-2.71,1.98)               | -0.28<br>(-2.61,2.05)               | 0                                   |                       |                       |                       |                       |                       |                       |    |
| EA+MA     | -0.29<br>(-4.54,3.96)               | -0.20<br>(-4.44,4.03)               | 0.08<br>(-3.47,3.62)                | 0                     |                       |                       |                       |                       |                       |    |
| CENK+MA   | -1.25<br>(-4.26,1.75)               | -1.17<br>(-4.24,1.91)               | -0.89<br>(-4.47,2.70)               | -0.96<br>(-6.00,4.07) | 0                     |                       |                       |                       |                       |    |
| WN        | -1.32<br>(-4.44,1.81)               | -1.23<br>(-3.93,1.47)               | -0.95<br>(-4.52,2.62)               | -1.03<br>(-6.05,4.00) | -0.06<br>(-4.16,4.03) | 0                     |                       |                       |                       |    |
| EA        | -1.89<br>(-5.33,1.55)               | -1.80<br>(-5.23,1.62)               | -1.52<br>(-4.04,1.00)               | -1.60<br>(-4.10,0.90) | -0.64<br>(-5.01,3.74) | -0.57<br>(-4.93,3.79) | 0                     |                       |                       |    |
| MA        | -1.80<br>(-3.27,-0.34) <sup>†</sup> | -1.72<br>(-3.15,-0.29) <sup>†</sup> | -1.44<br>(-3.27,0.40)               | -1.52<br>(-5.50,2.47) | -0.55<br>(-3.63,2.52) | -0.49<br>(-3.55,2.57) | 0.08<br>(-3.03,3.19)  | 0                     |                       |    |
| CA        | -1.99<br>(-3.55,-0.44) <sup>†</sup> | -1.91<br>(-3.59,-0.22) <sup>†</sup> | -1.63<br>(-4.12,0.87)               | -1.70<br>(-6.04,2.63) | -0.74<br>(-3.31,1.83) | -0.67<br>(-3.86,2.51) | -0.10<br>(-3.65,3.44) | -0.19<br>(-1.88,1.51) | 0                     |    |
| NK        | -2.23<br>(-5.15,0.70)               | -2.14<br>(-5.05,0.77)               | -1.86<br>(-3.62,-0.10) <sup>†</sup> | -1.94<br>(-5.89,2.02) | -0.97<br>(-4.96,3.02) | -0.91<br>(-4.88,3.06) | -0.34<br>(-3.41,2.73) | -0.42<br>(-2.96,2.12) | -0.23<br>(-3.29,2.82) | 0  |

Note:CA=common acupuncture; WN=warming needle; NK=needle knife; EA=electroacupuncture; CENK=catgut embedding needle knife; MA; massage

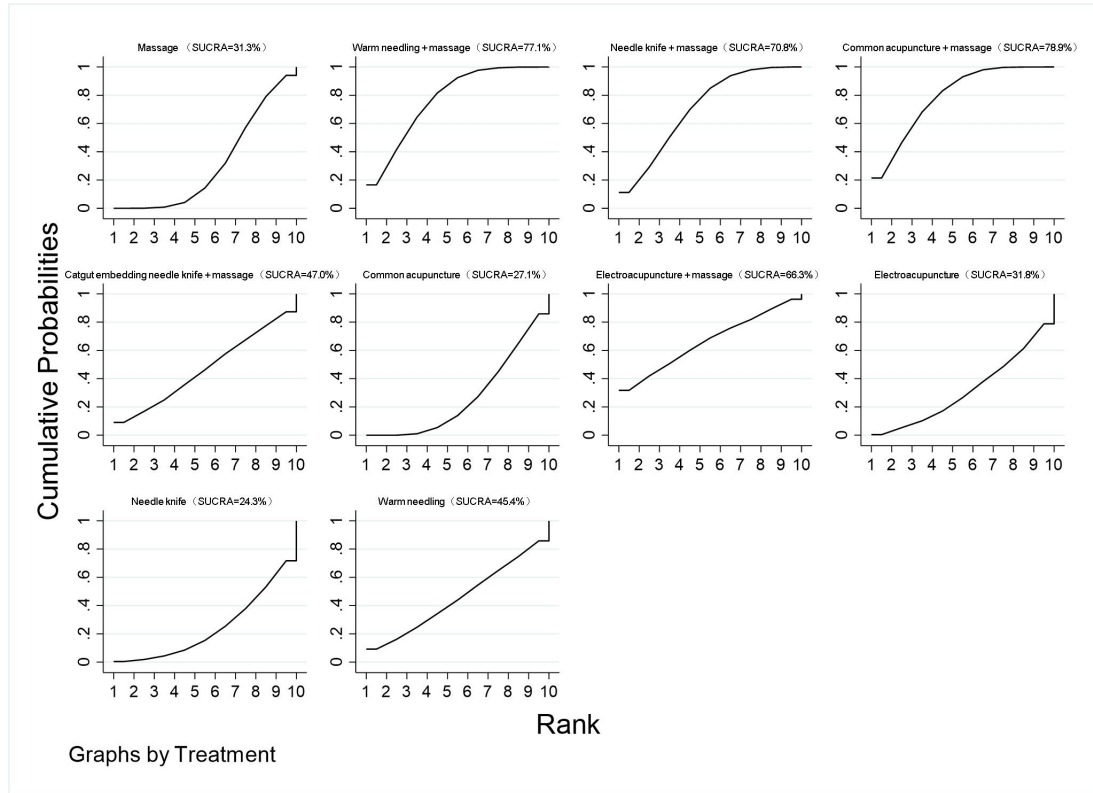

Figure S25 Sucra of VAS( $\geq 3$ weeks group)

### Total Lysholm Score(<3weeks group)

Table S15 Network Meta-analysis of Total lysholm score(<3weeks group)

| Treatment | SN+MA                                | NK+MA                                | CA+MA                               | WN+MA                              | MA                   | CA                   | WN |
|-----------|--------------------------------------|--------------------------------------|-------------------------------------|------------------------------------|----------------------|----------------------|----|
| SN+MA     | 0                                    |                                      |                                     |                                    |                      |                      |    |
| NK+MA     | 6.31<br>(0.58,12.05) <sup>1)</sup>   | 0                                    |                                     |                                    |                      |                      |    |
| CA+MA     | 10.81<br>(5.28,16.34) <sup>1)</sup>  | 4.50<br>(1.78,7.21) <sup>1)</sup>    | 0                                   |                                    |                      |                      |    |
| WN+MA     | 13.21<br>(7.85,18.58) <sup>1)</sup>  | 6.90<br>(4.56,9.24) <sup>1)</sup>    | 2.40<br>(0.62,4.19)                 | 0                                  |                      |                      |    |
| MA        | 18.81<br>(13.51,24.11) <sup>1)</sup> | 12.50<br>(10.30,14.69) <sup>1)</sup> | 8.00<br>(6.41,9.59)                 | 5.60<br>(4.78,6.41) <sup>1)</sup>  | 0                    |                      |    |
| CA        | 19.11<br>(13.54,24.68) <sup>1)</sup> | 12.80<br>(10.02,15.57) <sup>1)</sup> | 8.30<br>(6.58,10.02) <sup>1)</sup>  | 5.90<br>(4.01,7.78) <sup>1)</sup>  | 0.30<br>(-1.40,2.00) | 0                    |    |
| WN        | 21.74<br>(15.56,27.93) <sup>1)</sup> | 15.43<br>(11.56,19.31) <sup>1)</sup> | 10.93<br>(7.37,14.50) <sup>1)</sup> | 8.53<br>(5.44,11.62) <sup>1)</sup> | 2.93<br>(-0.26,6.13) | 2.63<br>(-0.98,6.25) | 0  |

Note:SN=silver needle; NK=needle knife; CA=common acupuncture; WN=warming needle; MA=message

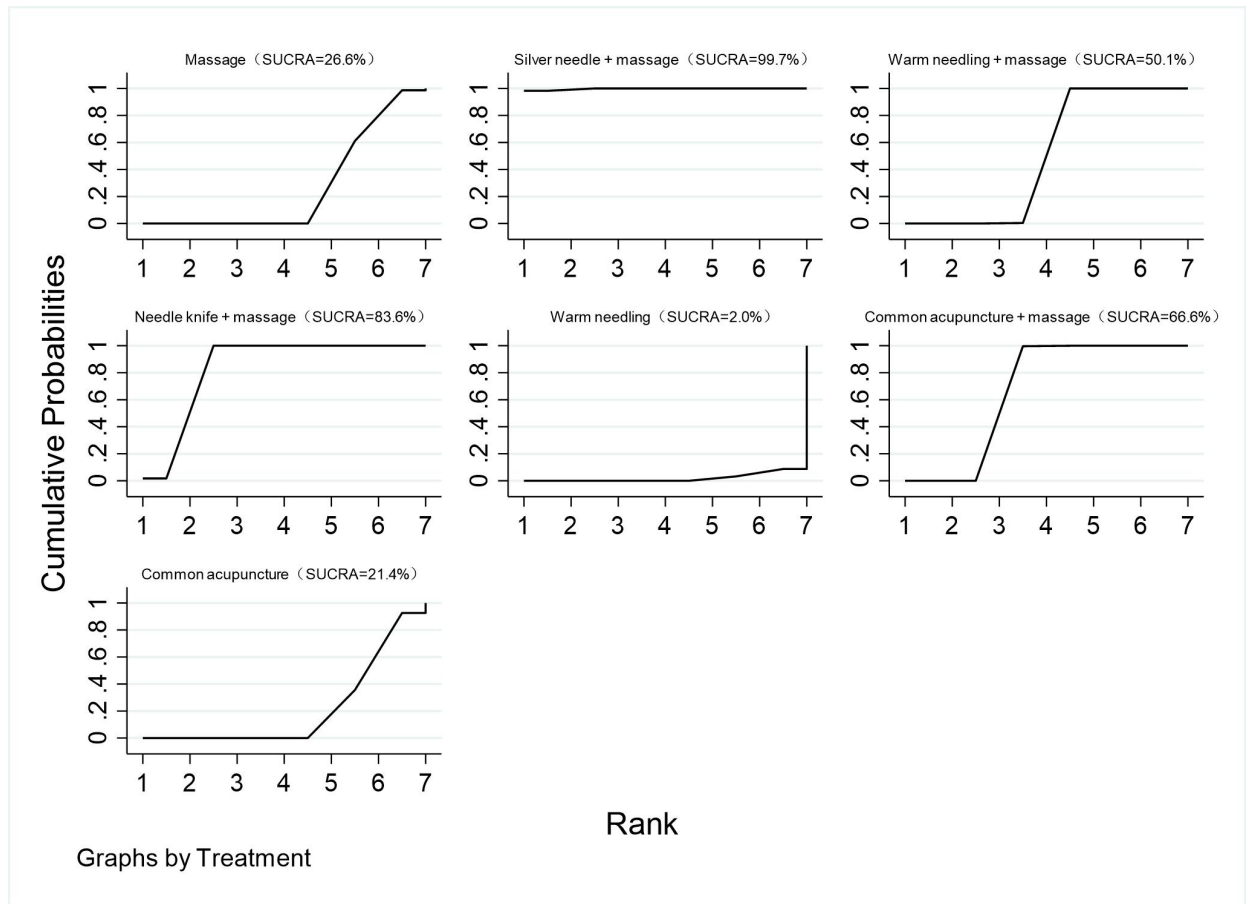

Figure S26 Sucra of Total lysholm score(<3weeks group)

### Total Lysholm Score( $\geq 3$ weeks group)

Table S16 Network Meta-analysis of Total lysholm score( $\geq 3$ weeks group)

| Treatment | EA+MA                                | NK+MA                                | WN+MA                                | MA                                  | CA+MA                               | EA                                 | CA |
|-----------|--------------------------------------|--------------------------------------|--------------------------------------|-------------------------------------|-------------------------------------|------------------------------------|----|
| EA+MA     | 0                                    |                                      |                                      |                                     |                                     |                                    |    |
| NK+MA     | 1.46<br>(-2.38,5.30)                 | 0                                    |                                      |                                     |                                     |                                    |    |
| WN+MA     | 4.67<br>(-1.65,10.99)                | 3.21<br>(-1.82,8.24)                 | 0                                    |                                     |                                     |                                    |    |
| MA        | 11.19<br>(3.87,18.50) <sup>1)</sup>  | 9.73<br>(3.49,15.97) <sup>1)</sup>   | 6.51<br>(2.98,10.05) <sup>1)</sup>   | 0                                   |                                     |                                    |    |
| CA+MA     | 11.63<br>(6.33,16.93)                | 10.17<br>(6.51,13.83) <sup>1)</sup>  | 6.96<br>(3.45,10.47) <sup>1)</sup>   | 0.44<br>(-4.76,5.64)                | 0                                   |                                    |    |
| EA        | 14.00<br>(11.17,16.83) <sup>1)</sup> | 12.54<br>(9.94,15.14) <sup>1)</sup>  | 9.33<br>(3.67,14.98) <sup>1)</sup>   | 2.81<br>(-3.94,9.57)                | 2.37<br>(-2.12,6.86)                | 0                                  |    |
| CA        | 22.84<br>(15.63,30.05) <sup>1)</sup> | 21.38<br>(15.28,27.48) <sup>1)</sup> | 18.17<br>(12.15,24.18) <sup>1)</sup> | 11.65<br>(4.52,18.79) <sup>1)</sup> | 11.21<br>(6.33,16.09) <sup>1)</sup> | 8.84<br>(2.21,15.47) <sup>1)</sup> | 0  |

Note:EA=electroacupuncture; NK=needle knife; WN=warming needle; CA=common acupuncture; MA=message

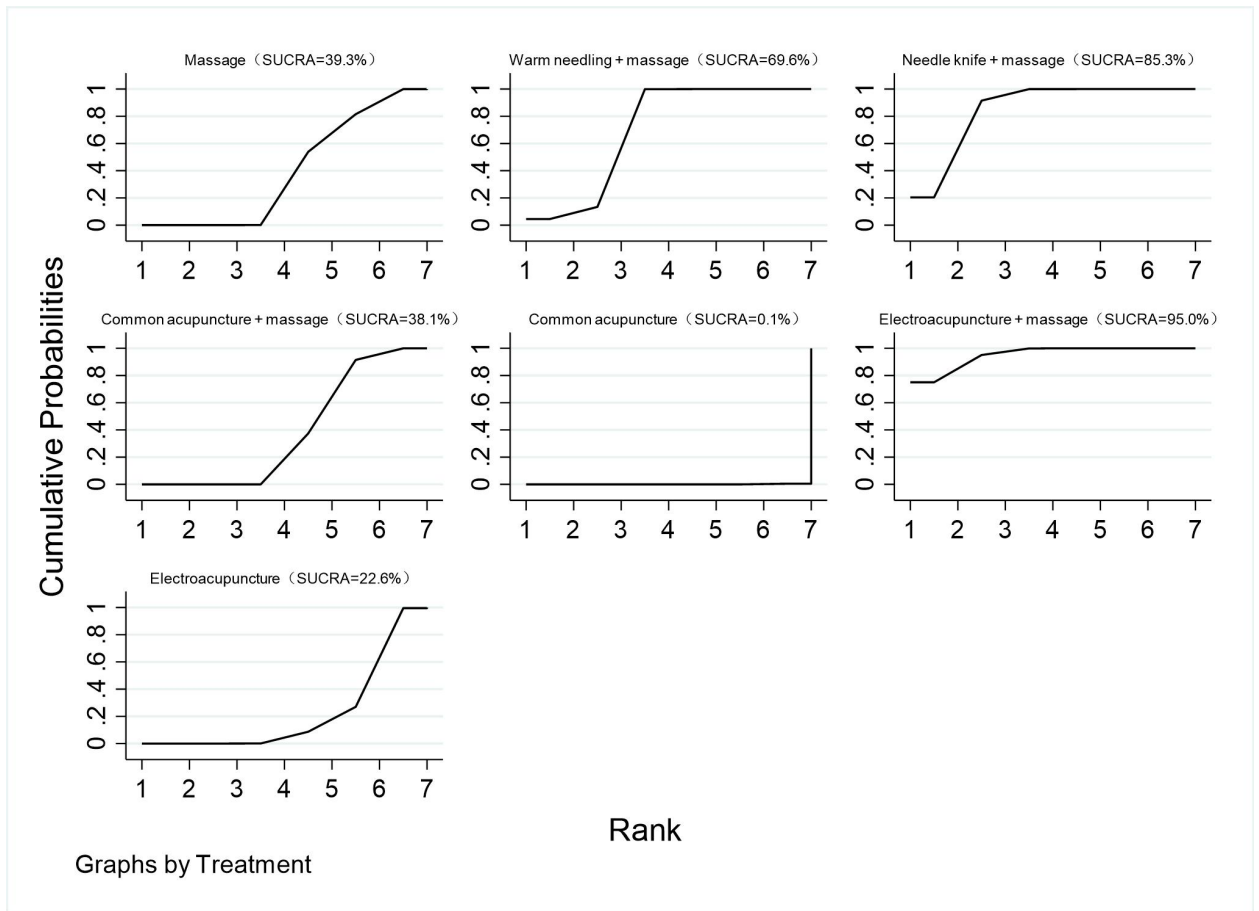

**Figure S27 Sucra of Total lysholm score( $\geq$ 3weeks group)**

Table S17 Introduction to different acupuncture and massage therapies

**Electrothermal needle:** it is a new acupuncture treatment method invented according to the principle of electric needle, which can make the needle body heat up and treat diseases after penetrating into the acupoint of the body. **Operation:** select the acupoint or stimulation site, disinfect the needle quickly into the skin, and then slowly and slightly twist the needle to reach the due depth, find the needle sense, enhance the needle sense to the required degree. Switch on the controller, turn on the heating button and slowly make the pointer of the instrument rise. Stop when the required temperature is reached.

**Floating needle:** Floating needle therapy is a kind of acupuncture therapy that uses disposable floating needles and other needles to clean the superficial subcutaneous fascia around the local pain. It is a combination of traditional acupuncture and modern medicine. **Operation:** after inserting the needle, take the needle point as the fulcrum, hold the needle holder by hand, swing from side to side, make the needle body fan-shaped movement.

**Fire needle:** it is a method to treat diseases by stabbing the point quickly with the point of burning red. **Operation:** when needling, use a red-hot needle to quickly Pierce into the selected acupoint, that is, to quickly withdraw the needle.

**Silver needle:** The silver needle is made of 80% silver and has good heat conduction function. **Operation:** connect the equipment, turn on the heating button, and slowly make the pointer of the instrument rise. Stop when the required temperature is reached.

**Warm needle:** Warm needle is in the application of acupuncture at the same time to warm stimulation of a therapy. **Operation:** After gas is injected into the needle, mugwort or moxa is placed on the needle handle to make heat pass through the needle into the body.

**Beryllium needle:** A needle shaped like a sword with blades on both sides. **Operation:** Aim the needle tip at the center of the skin "cross" indentation, and quickly insert the needle. When the needle tip touches the deep fascia, release it.

**Electroacupuncture:** it is a kind of therapy to stimulate acupoints and treat diseases by inserting acupuncture points to get qi and passing (sensing) the micro current wave of human bioelectricity on the needle. **Operation:** after acupuncture, adjust the output potentiometer to "0", connect the two wires arbitrarily on the two needle handles, then turn on the power switch, select the wave type, and slowly increase the output current to the required.

**Needle knife:** A needle tool made of metal material that resembles both a needle and a knife in shape. The width of the needle knife is usually equal to the diameter of the needle body and the edge is sharp. **Operation:** After inserting the needle, select a certain technique to release and peel the adhesive tissue fibers.

**Catgut embedding needle knife:** it is a newly developed instrument based on needleknife, which can be used for embedding at the same time while releasing adhesion. **Operation:** Hold the catgut embedding needle knife, Pierce into the acupoint, bury the thread body into the subcutaneous tissue,

then rotate and exit the catgut embedding needle knife.

**Common acupuncture:** it is a kind of needle made of stainless steel. **Operation:** After penetrating the skin, the most common method is to lift, insert, twist and other techniques to achieve the purpose of gas.

**Note:** electrothermal needle, silver needle and warm needle are all inserted into the skin and then connected to the device or inserted into mugwort and mogwort to achieve the purpose of ditherability. The materials of the three are different. Needle knife, buried needle knife and beryllium needle all have blades with different shapes and operating methods.

**Chinese traditional tuina :** The tuina method is carried out under the guidance of the “Theory and Practice of Tuina”, and there are certain regulations on the operation steps, including pushing, take, mention, knead, point, pull, etc.

**Joint mobilization:** Joint mobilization technology is a highly targeted manual manipulation technique performed by the therapist within the movable range of joint motion. It belongs to the category of passive motion, and its operation speed is slower than that of massage. In application, the physiological motion and accessory motion of the joint are often selected. The main operations include swing, roll, slide, and rotate.

Table S18 The checklist of the PRISMA for network meta-analysis

| Section/Topic             | Item # | Checklist Item                                                                                                                                                                                                                                                                                                                                                                                                                                                                                                                                                                                                                                                                                                                                                                          | Reported on Page # |
|---------------------------|--------|-----------------------------------------------------------------------------------------------------------------------------------------------------------------------------------------------------------------------------------------------------------------------------------------------------------------------------------------------------------------------------------------------------------------------------------------------------------------------------------------------------------------------------------------------------------------------------------------------------------------------------------------------------------------------------------------------------------------------------------------------------------------------------------------|--------------------|
| <b>TITLE</b>              |        |                                                                                                                                                                                                                                                                                                                                                                                                                                                                                                                                                                                                                                                                                                                                                                                         |                    |
| Title                     | 1      | Identify the report as a systematic review <i>incorporating a network meta-analysis (or related form of meta-analysis)</i> .                                                                                                                                                                                                                                                                                                                                                                                                                                                                                                                                                                                                                                                            | 1                  |
| <b>ABSTRACT</b>           |        |                                                                                                                                                                                                                                                                                                                                                                                                                                                                                                                                                                                                                                                                                                                                                                                         |                    |
| Structured summary        | 2      | Provide a structured summary including, as applicable:<br><b>Background:</b> main objectives<br><b>Methods:</b> data sources; study eligibility criteria, participants, and interventions; study appraisal; and <i>synthesis methods, such as network meta-analysis</i> .<br><b>Results:</b> number of studies and participants identified; summary estimates with corresponding confidence/credible intervals; <i>treatment rankings may also be discussed. Authors may choose to summarize pairwise comparisons against a chosen treatment included in their analyses for brevity.</i><br><b>Discussion/Conclusions:</b> limitations; conclusions and implications of findings.<br><b>Other:</b> primary source of funding; systematic review registration number with registry name. | 1-2                |
| <b>INTRODUCTION</b>       |        |                                                                                                                                                                                                                                                                                                                                                                                                                                                                                                                                                                                                                                                                                                                                                                                         |                    |
| Rationale                 | 3      | Describe the rationale for the review in the context of what is already known, <i>including mention of why a network meta-analysis has been conducted.</i> _                                                                                                                                                                                                                                                                                                                                                                                                                                                                                                                                                                                                                            | 2-3                |
| Objectives                | 4      | Provide an explicit statement of questions being addressed, with reference to participants, interventions, comparisons, outcomes, and study design (PICOS).                                                                                                                                                                                                                                                                                                                                                                                                                                                                                                                                                                                                                             | 3-4                |
| <b>METHODS</b>            |        |                                                                                                                                                                                                                                                                                                                                                                                                                                                                                                                                                                                                                                                                                                                                                                                         |                    |
| Protocol and registration | 5      | Indicate whether a review protocol exists and if and where it can be accessed (e.g., Web address); and, if available, provide registration information, including registration number.                                                                                                                                                                                                                                                                                                                                                                                                                                                                                                                                                                                                  | 1                  |
| Eligibility criteria      | 6      | Specify study characteristics (e.g., PICOS, length of follow-up) and report characteristics (e.g., years                                                                                                                                                                                                                                                                                                                                                                                                                                                                                                                                                                                                                                                                                |                    |



|                                        |           |                                                                                                                                                                                                                                                                                                                                   |              |
|----------------------------------------|-----------|-----------------------------------------------------------------------------------------------------------------------------------------------------------------------------------------------------------------------------------------------------------------------------------------------------------------------------------|--------------|
|                                        |           | considered, language, publication status) used as criteria for eligibility, giving rationale. <i>Clearly describe eligible treatments included in the treatment network, and note whether any have been clustered or merged into the same node (with justification).</i> _                                                        | <b>4-5</b>   |
| Information sources                    | 7         | Describe all information sources (e.g., databases with dates of coverage, contact with study authors to identify additional studies) in the search and date last searched.                                                                                                                                                        | <b>4-6</b>   |
| Search                                 | 8         | Present full electronic search strategy for at least one database, including any limits used, such that it could be repeated.                                                                                                                                                                                                     | <b>SM2-3</b> |
| Study selection                        | 9         | State the process for selecting studies (i.e., screening, eligibility, included in systematic review, and, if applicable, included in the meta-analysis).                                                                                                                                                                         | <b>5</b>     |
| Data collection process                | 10        | Describe method of data extraction from reports (e.g., piloted forms, independently, in duplicate) and any processes for obtaining and confirming data from investigators.                                                                                                                                                        | <b>4-5</b>   |
| Data items                             | 11        | List and define all variables for which data were sought (e.g., PICOS, funding sources) and any assumptions and simplifications made.                                                                                                                                                                                             | <b>4-5</b>   |
| <b>Geometry of the network</b>         | <b>S1</b> | Describe methods used to explore the geometry of the treatment network under study and potential biases related to it. This should include how the evidence base has been graphically summarized for presentation, and what characteristics were compiled and used to describe the evidence base to readers.                      |              |
| Risk of bias within individual studies | 12        | Describe methods used for assessing risk of bias of individual studies (including specification of whether this was done at the study or outcome level), and how this information is to be used in any data synthesis.                                                                                                            | <b>11</b>    |
| Summary measures                       | 13        | State the principal summary measures (e.g., risk ratio, difference in means). <i>Also describe the use of additional summary measures assessed, such as treatment rankings and surface under the cumulative ranking curve (SUCRA) values, as well as modified approaches used to present summary findings from meta-analyses.</i> | <b>5-6</b>   |
| Planned methods of analysis            | 14        | Describe the methods of handling data and combining results of studies for each network meta-analysis. This should include, but not be                                                                                                                                                                                            | <b>5-6</b>   |

|                                          |           |                                                                                                                                                                                                                                                                                                                                                                                                                                                   |              |
|------------------------------------------|-----------|---------------------------------------------------------------------------------------------------------------------------------------------------------------------------------------------------------------------------------------------------------------------------------------------------------------------------------------------------------------------------------------------------------------------------------------------------|--------------|
|                                          |           | <p>limited to:</p> <ul style="list-style-type: none"> <li>• <i>Handling of multi-arm trials;</i></li> <li>• <i>Selection of variance structure;</i></li> <li>• <i>Selection of prior distributions in Bayesian analyses; and</i></li> <li>• <i>Assessment of model fit.</i></li> </ul>                                                                                                                                                            |              |
| <b>Assessment of Inconsistency</b>       | <b>S2</b> | Describe the statistical methods used to evaluate the agreement of direct and indirect evidence in the treatment network(s) studied. Describe efforts taken to address its presence when found.                                                                                                                                                                                                                                                   | <b>5-6</b>   |
| Risk of bias across studies              | 15        | Specify any assessment of risk of bias that may affect the cumulative evidence (e.g., publication bias, selective reporting within studies).                                                                                                                                                                                                                                                                                                      | <b>11</b>    |
| Additional analyses                      | 16        | Describe methods of additional analyses if done, indicating which were pre-specified. This may include, but not be limited to, the following: <ul style="list-style-type: none"> <li>• Sensitivity or subgroup analyses;</li> <li>• Meta-regression analyses;</li> <li>• <i>Alternative formulations of the treatment network; and</i></li> <li>• <i>Use of alternative prior distributions for Bayesian analyses (if applicable).</i></li> </ul> | <b>26-28</b> |
| <b>RESULTS†</b>                          |           |                                                                                                                                                                                                                                                                                                                                                                                                                                                   |              |
| Study selection                          | 17        | Give numbers of studies screened, assessed for eligibility, and included in the review, with reasons for exclusions at each stage, ideally with a flow diagram.                                                                                                                                                                                                                                                                                   | <b>6-7</b>   |
| <b>Presentation of network structure</b> | <b>S3</b> | Provide a network graph of the included studies to enable visualization of the geometry of the treatment network.                                                                                                                                                                                                                                                                                                                                 | <b>13-22</b> |
| <b>Summary of network geometry</b>       | <b>S4</b> | Provide a brief overview of characteristics of the treatment network. This may include commentary on the abundance of trials and randomized patients for the different interventions and pairwise comparisons in the network, gaps of evidence in the treatment network, and potential biases reflected by the network structure.                                                                                                                 | <b>13-26</b> |
| Study                                    | 18        | For each study, present characteristics for which                                                                                                                                                                                                                                                                                                                                                                                                 | <b>6-10</b>  |

|                                      |           |                                                                                                                                                                                                                                                                                                                                                                                                                                                              |         |
|--------------------------------------|-----------|--------------------------------------------------------------------------------------------------------------------------------------------------------------------------------------------------------------------------------------------------------------------------------------------------------------------------------------------------------------------------------------------------------------------------------------------------------------|---------|
| characteristics                      |           | data were extracted (e.g., study size, PICOS, follow-up period) and provide the citations.                                                                                                                                                                                                                                                                                                                                                                   |         |
| Risk of bias within studies          | 19        | Present data on risk of bias of each study and, if available, any outcome level assessment.                                                                                                                                                                                                                                                                                                                                                                  | 11      |
| Results of individual studies        | 20        | For all outcomes considered (benefits or harms), present, for each study: 1) simple summary data for each intervention group, and 2) effect estimates and confidence intervals. <i>Modified approaches may be needed to deal with information from larger networks.</i>                                                                                                                                                                                      | 13-26   |
| Synthesis of results                 | 21        | Present results of each meta-analysis done, including confidence/credible intervals. <i>In larger networks, authors may focus on comparisons versus a particular comparator (e.g. placebo or standard care), with full findings presented in an appendix. League tables and forest plots may be considered to summarize pairwise comparisons.</i> If additional summary measures were explored (such as treatment rankings), these should also be presented. | 13-26   |
| <b>Exploration for inconsistency</b> | <b>S5</b> | Describe results from investigations of inconsistency. This may include such information as measures of model fit to compare consistency and inconsistency models, <i>P</i> values from statistical tests, or summary of inconsistency estimates from different parts of the treatment network.                                                                                                                                                              | 13-26   |
| Risk of bias across studies          | 22        | Present results of any assessment of risk of bias across studies for the evidence base being studied.                                                                                                                                                                                                                                                                                                                                                        |         |
| Results of additional analyses       | 23        | Give results of additional analyses, if done (e.g., sensitivity or subgroup analyses, meta-regression analyses, <i>alternative network geometries studied, alternative choice of prior distributions for Bayesian analyses, and so forth</i> ).                                                                                                                                                                                                              | SM12-27 |
| <b>DISCUSSION</b>                    |           |                                                                                                                                                                                                                                                                                                                                                                                                                                                              |         |
| Summary of evidence                  | 24        | Summarize the main findings, including the strength of evidence for each main outcome; consider their relevance to key groups (e.g., healthcare providers, users, and policy-makers).                                                                                                                                                                                                                                                                        | 28-30   |
| Limitations                          | 25        | Discuss limitations at study and outcome level (e.g., risk of bias), and at review level (e.g., incomplete retrieval of identified research, reporting bias). <i>Comment on the validity of the assumptions, such as transitivity and consistency. Comment on any concerns regarding network geometry (e.g.,</i>                                                                                                                                             | 31      |

*avoidance of certain comparisons).*

|                |    |                                                                                                                                                                                                                                                                                                                                                                                                                                |           |
|----------------|----|--------------------------------------------------------------------------------------------------------------------------------------------------------------------------------------------------------------------------------------------------------------------------------------------------------------------------------------------------------------------------------------------------------------------------------|-----------|
| Conclusions    | 26 | Provide a general interpretation of the results in the context of other evidence, and implications for future research.                                                                                                                                                                                                                                                                                                        | <b>31</b> |
| <b>FUNDING</b> |    |                                                                                                                                                                                                                                                                                                                                                                                                                                |           |
| Funding        | 27 | Describe sources of funding for the systematic review and other support (e.g., supply of data); role of funders for the systematic review. This should also include information regarding whether funding has been received from manufacturers of treatments in the network and/or whether some of the authors are content experts with professional conflicts of interest that could affect use of treatments in the network. | <b>1</b>  |

PICOS = population, intervention, comparators, outcomes, study design.

\* Text in italics indicates wording specific to reporting of network meta-analyses that has been added to guidance from the PRISMA statement.

† Authors may wish to plan for use of appendices to present all relevant information in full detail for items in this section.
